# Supplementary material for: Diclofenac N-Derivatives as Therapeutic Agents with Anti-Inflammatory and Anti-Cancer Effect
Source: MDPI journal article supplement (doi:10.3390/ijms22105067), 2021-05-11
Supplement: s1 [file s1]

## **Supporting information**

### **Diclofenac N-Derivatives as Therapeutic Agents with Anti-Inflammatory and Anti-Cancer Effect**

Alberto Galisteo, Fatin Jannus, Amalia García-García, Houssam Aheget, Sara Rojas,  
José A. Lupiañez, Antonio Rodríguez-Diéguez, Fernando J. Reyes-Zurita \* and José F.  
Quílez del Moral \*

#### ***Table of Content***

**Figure S1. Copies of NMR spectra of the synthesized spectra S2-S27**

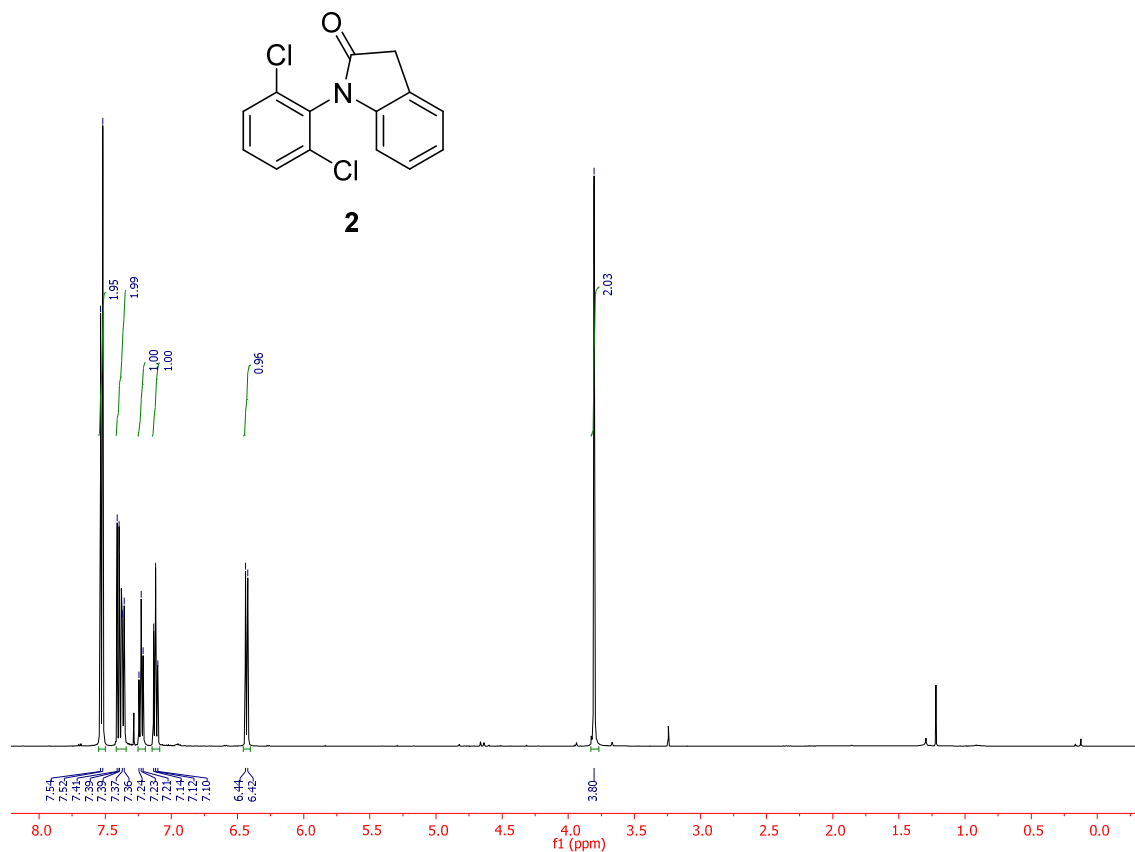

**Figure S1a.** <sup>1</sup>H NMR spectrum of compound **2**

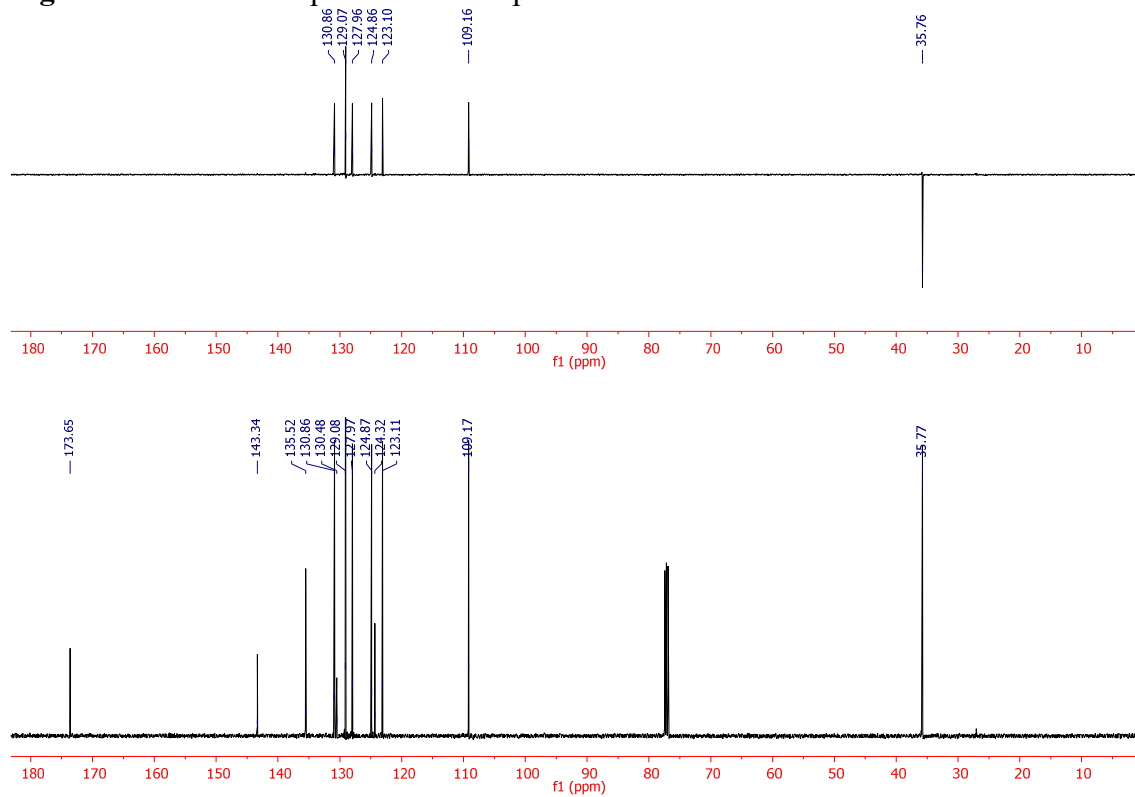

**Figure S1b.** <sup>13</sup>C NMR spectrum of compound **2**

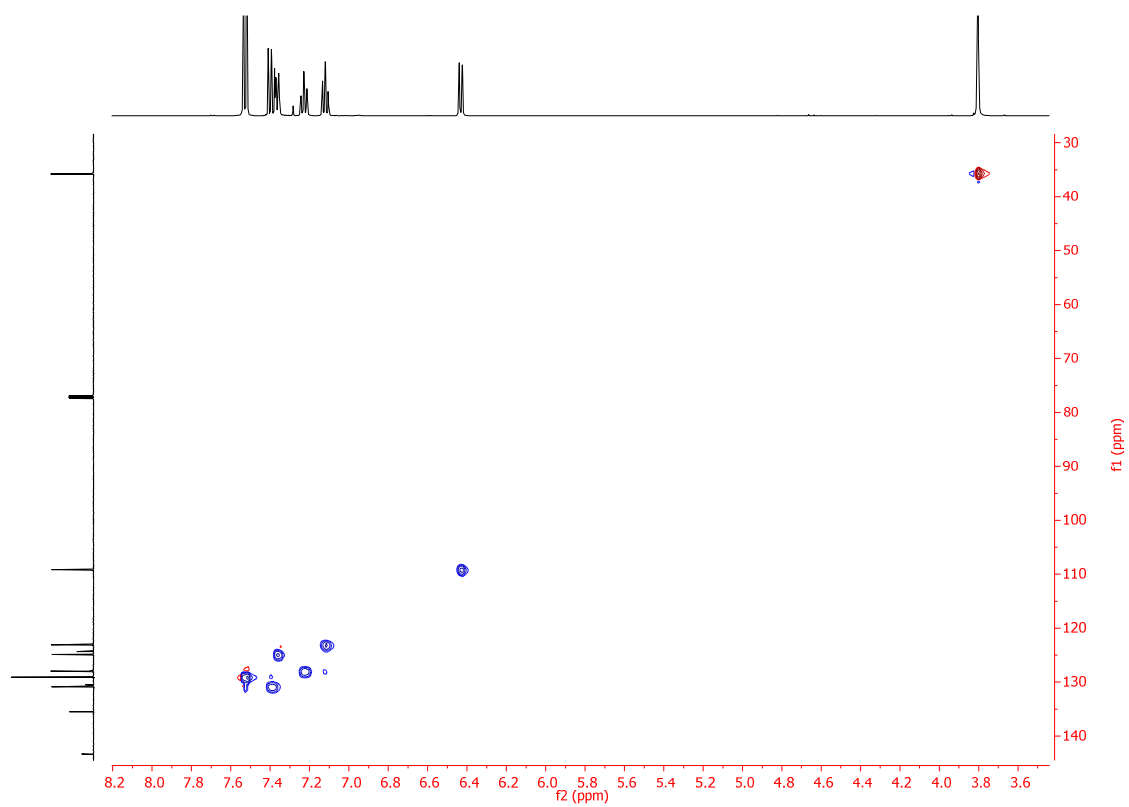

**Figure S1c.** HSQC of compound **2**

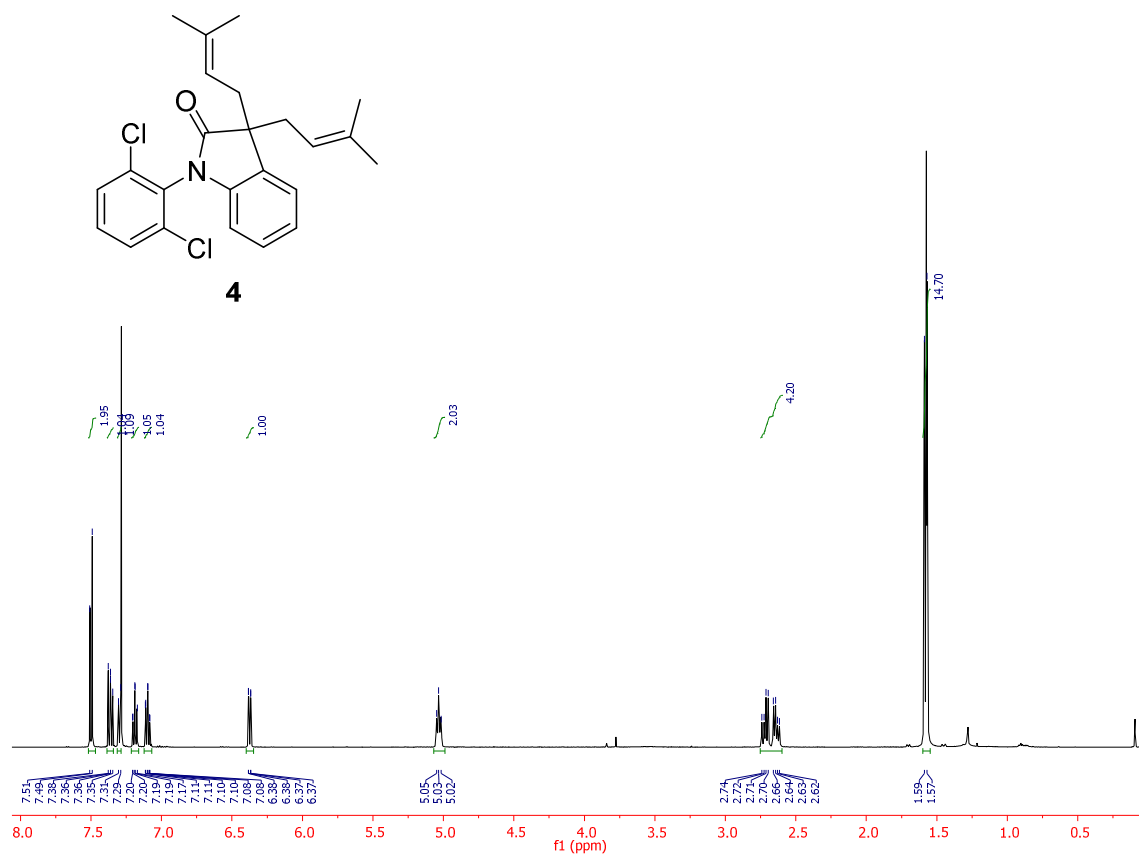

**Figure S1d.** <sup>1</sup>H NMR spectrum of compound **4**

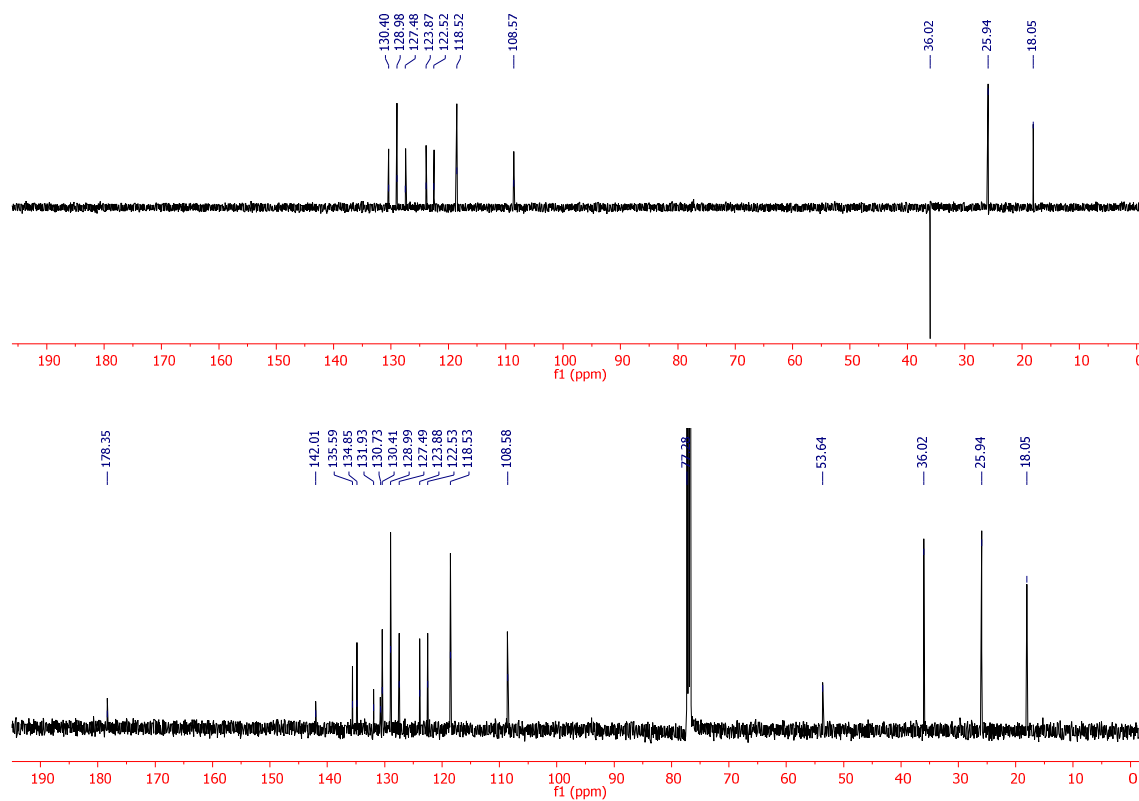

**Figure S1e.** <sup>13</sup>C NMR spectrum of compound **4**

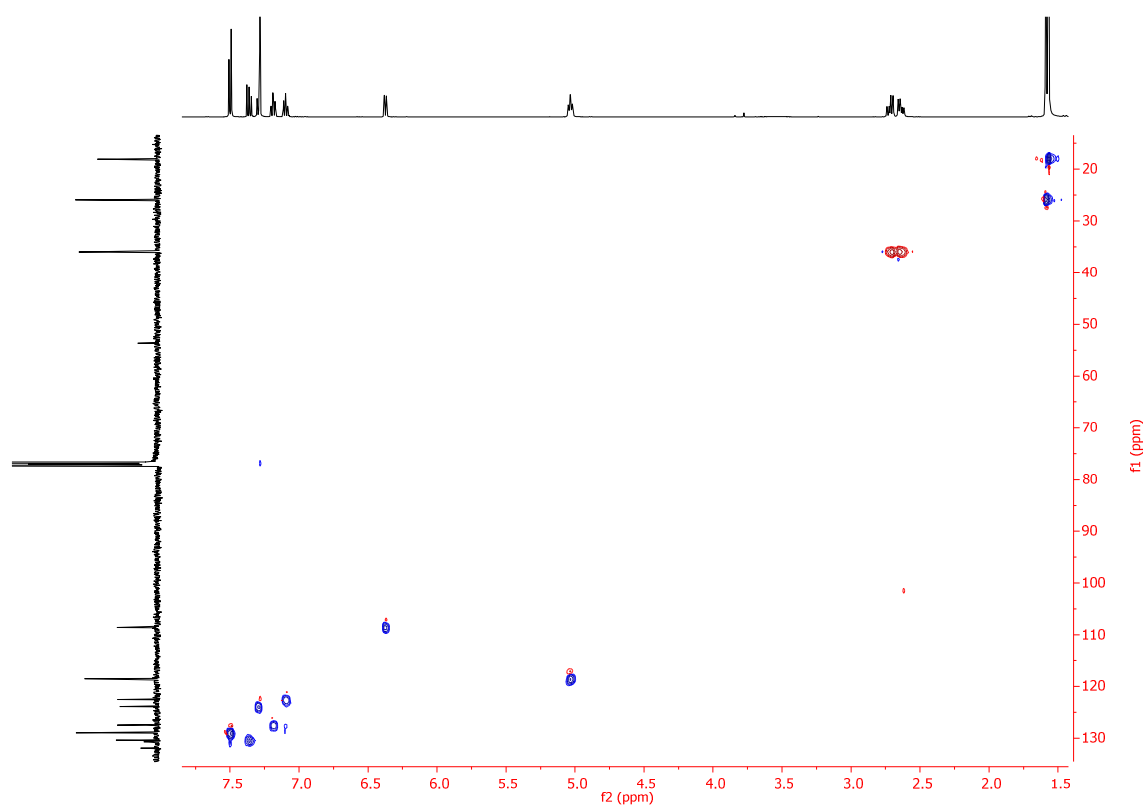

**Figure S1f.** HSQC of compound 4

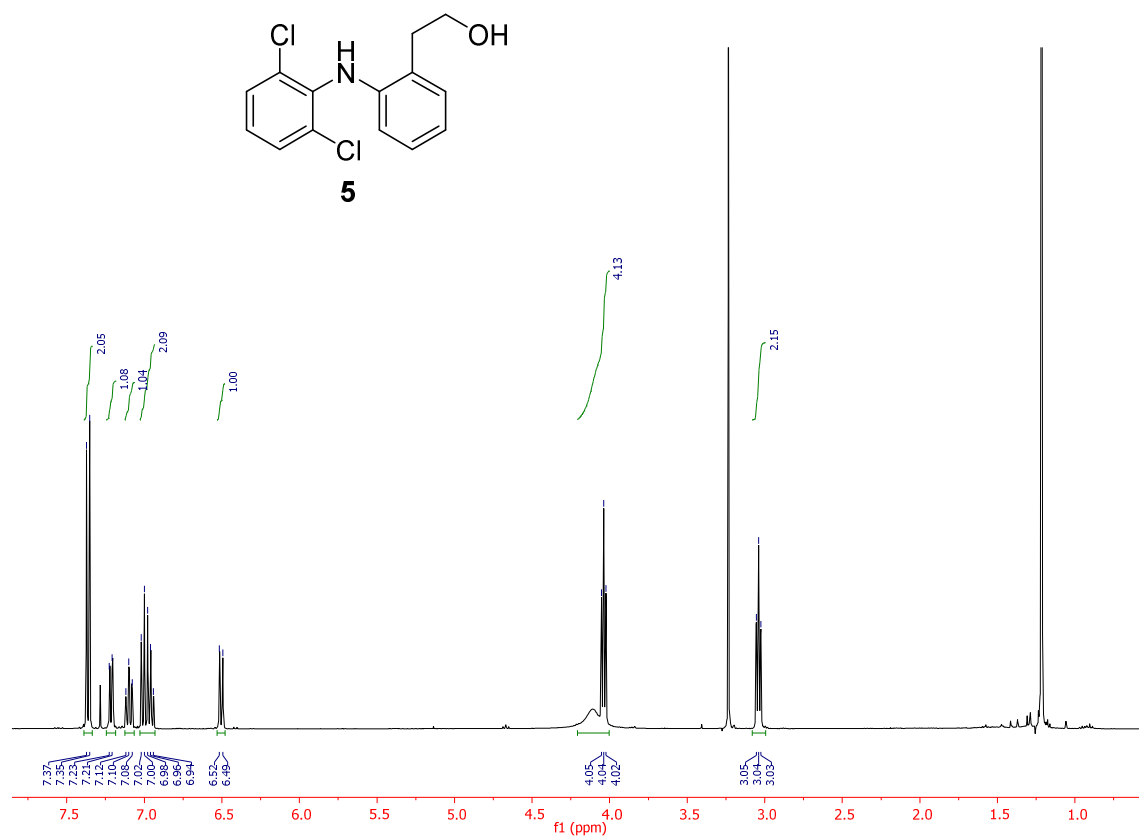

**Figure S1g.**  $^1\text{H}$  NMR spectrum of compound **5**

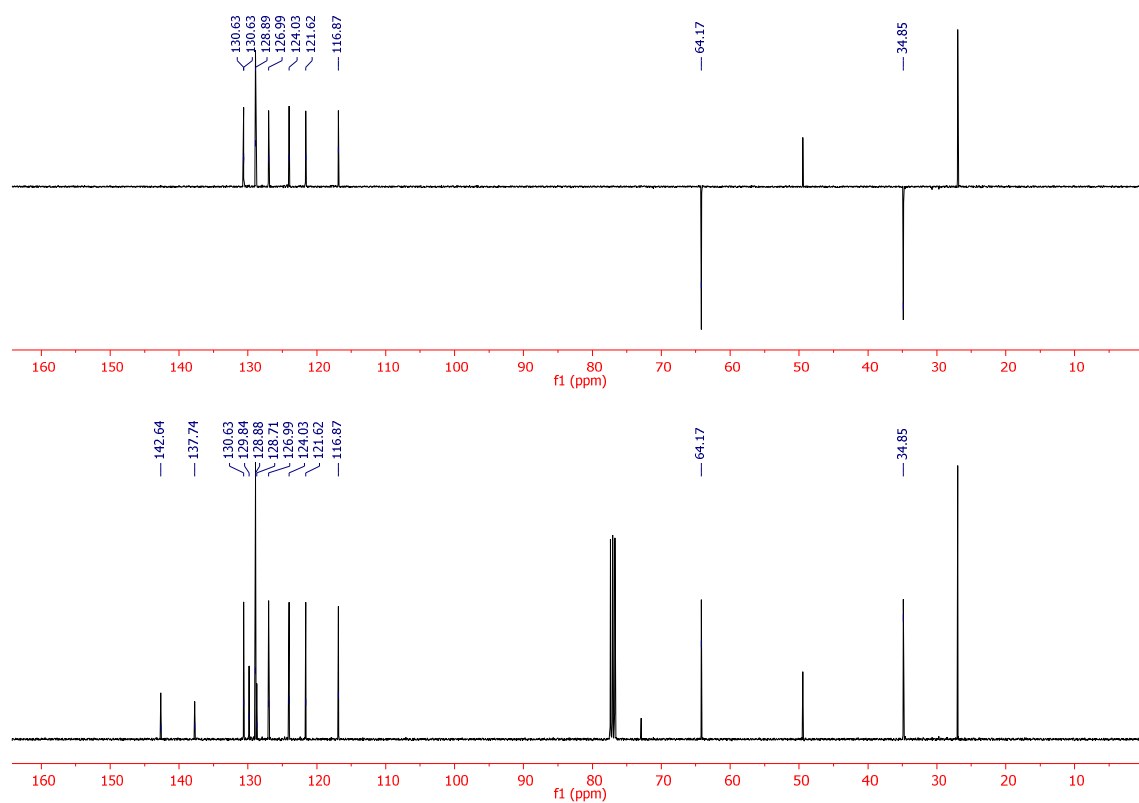

**Figure S1h.**  $^{13}\text{C}$  NMR spectrum of compound **5**

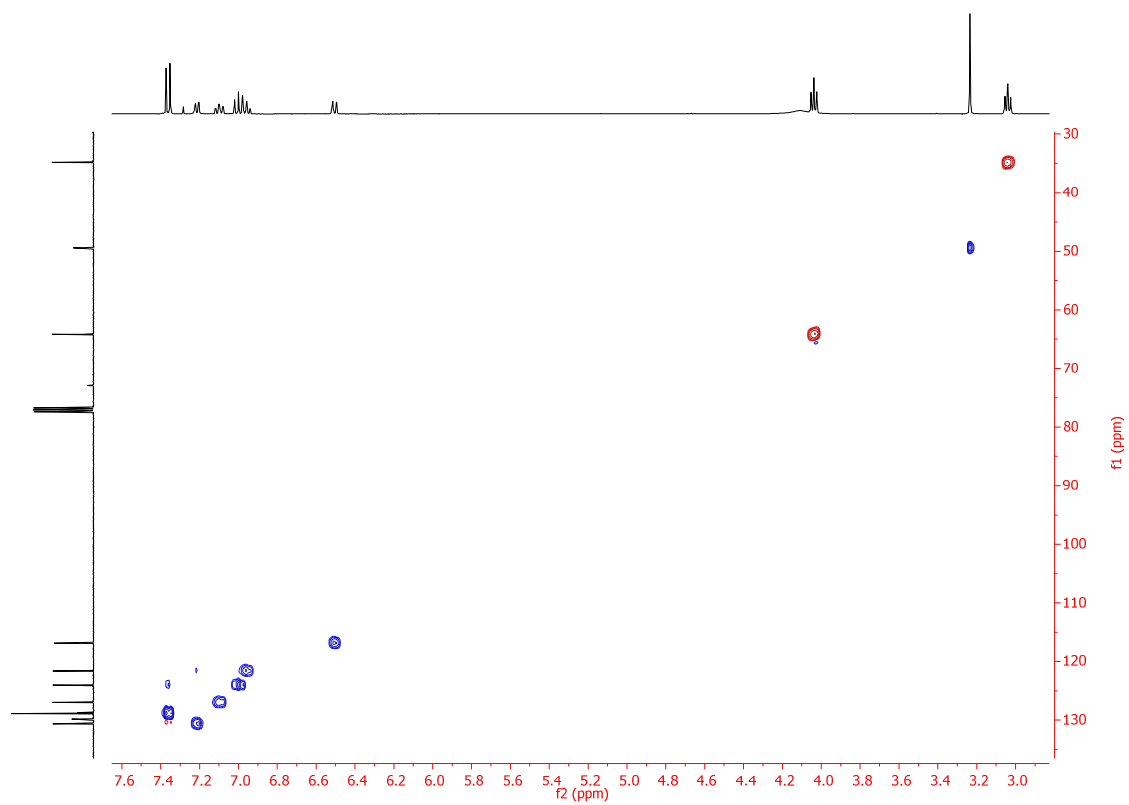

**Figure S1i.** HSQC of compound **5**

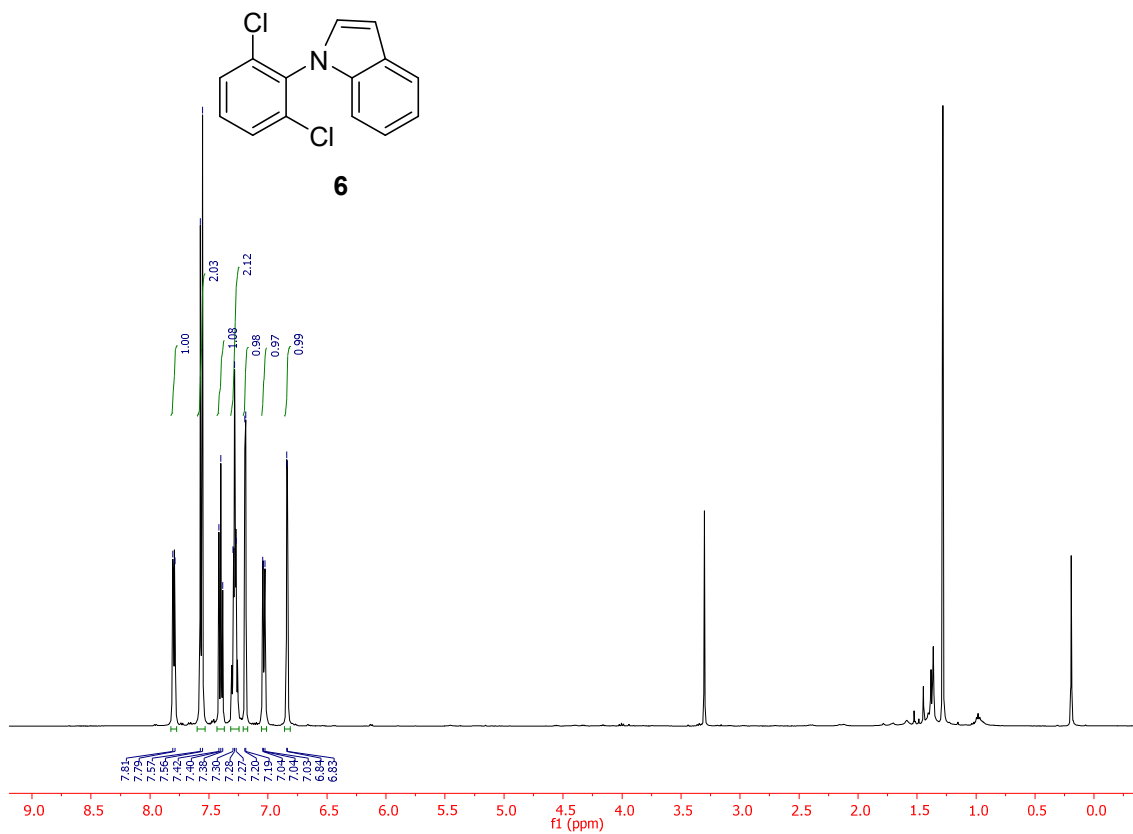

**Figure S1j.** <sup>1</sup>H NMR spectrum of compound **6**

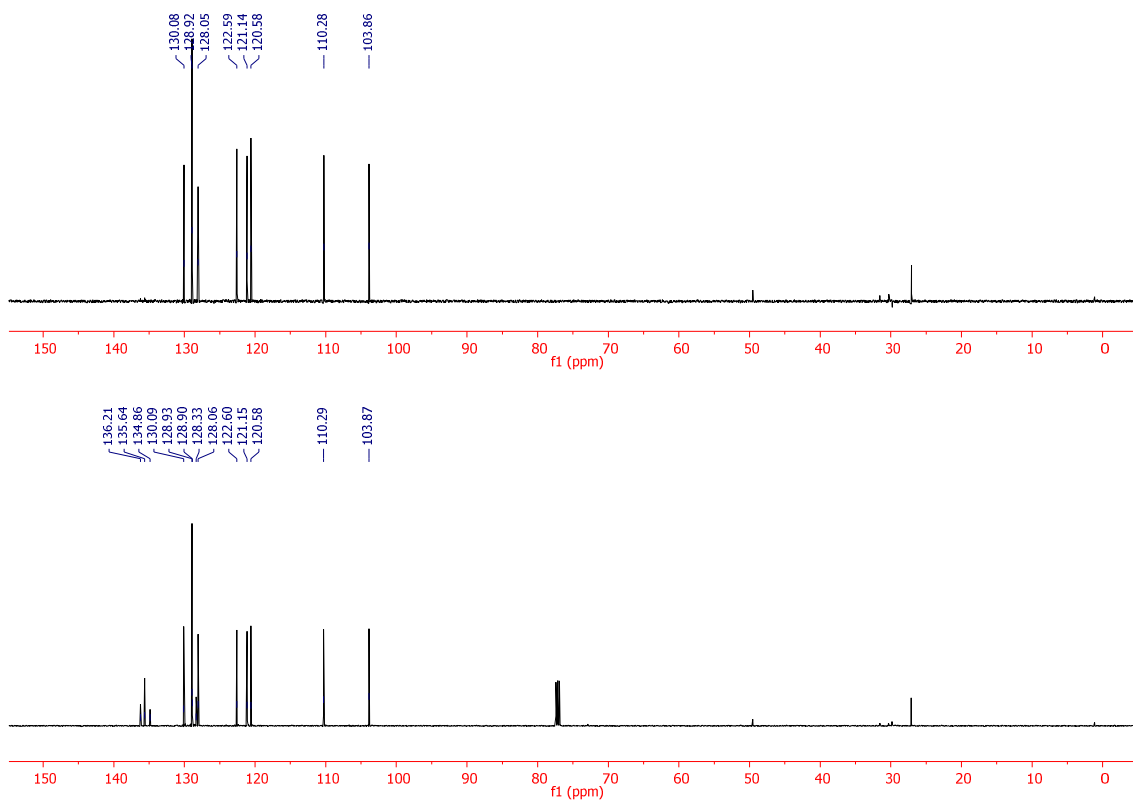

**Figure S1k.** <sup>13</sup>C NMR spectrum of compound **6**



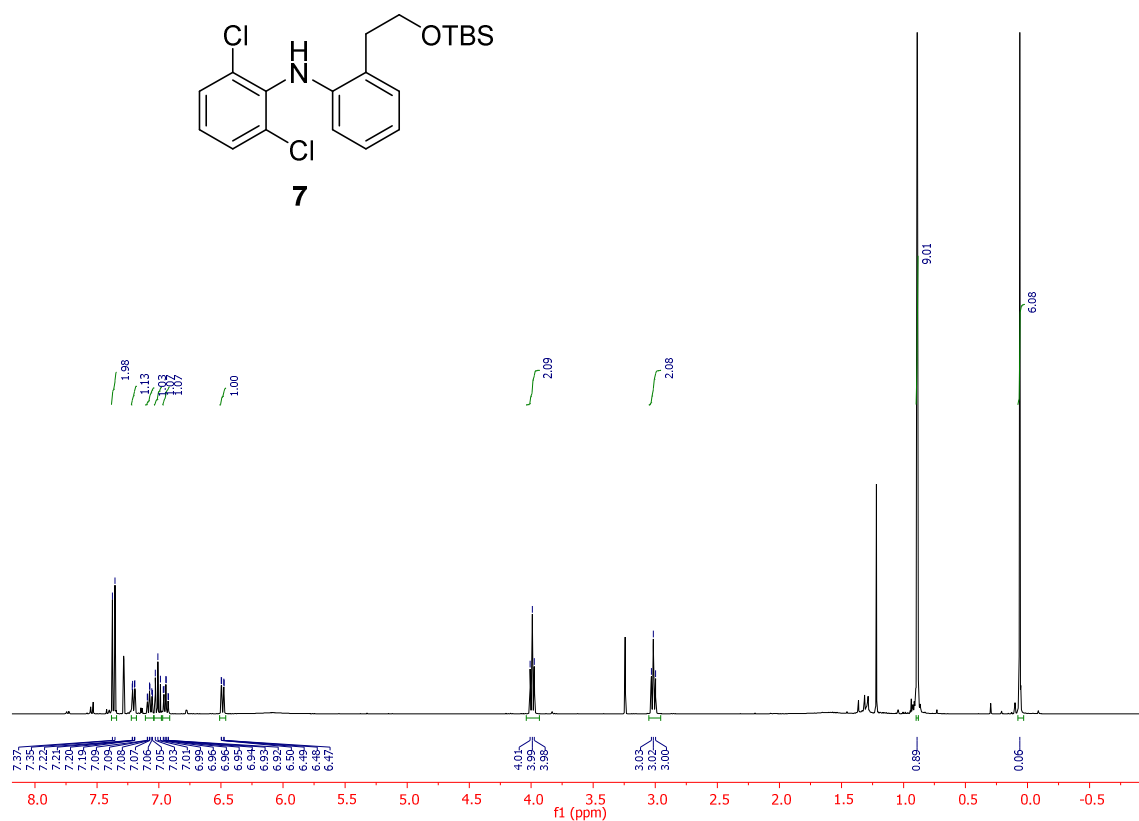

**Figure S1l.** <sup>1</sup>H NMR spectrum of compound **7**

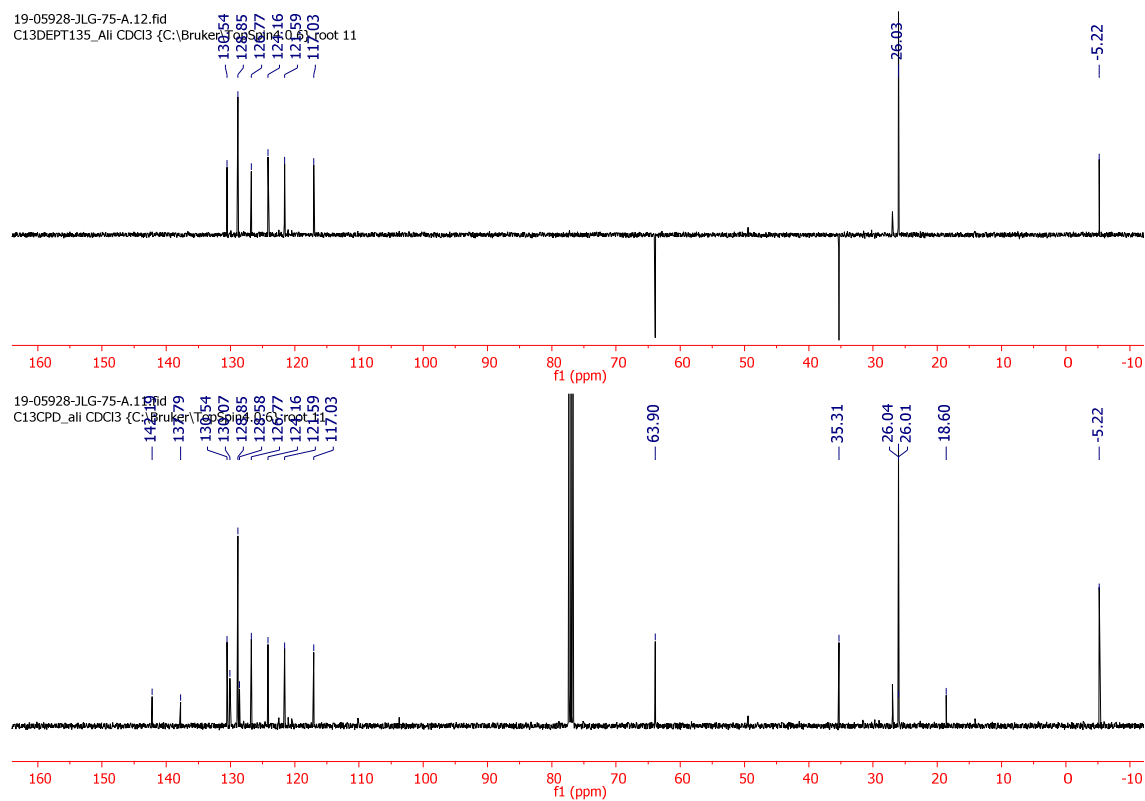

**Figure S1m.** <sup>13</sup>C NMR spectrum of compound **7**

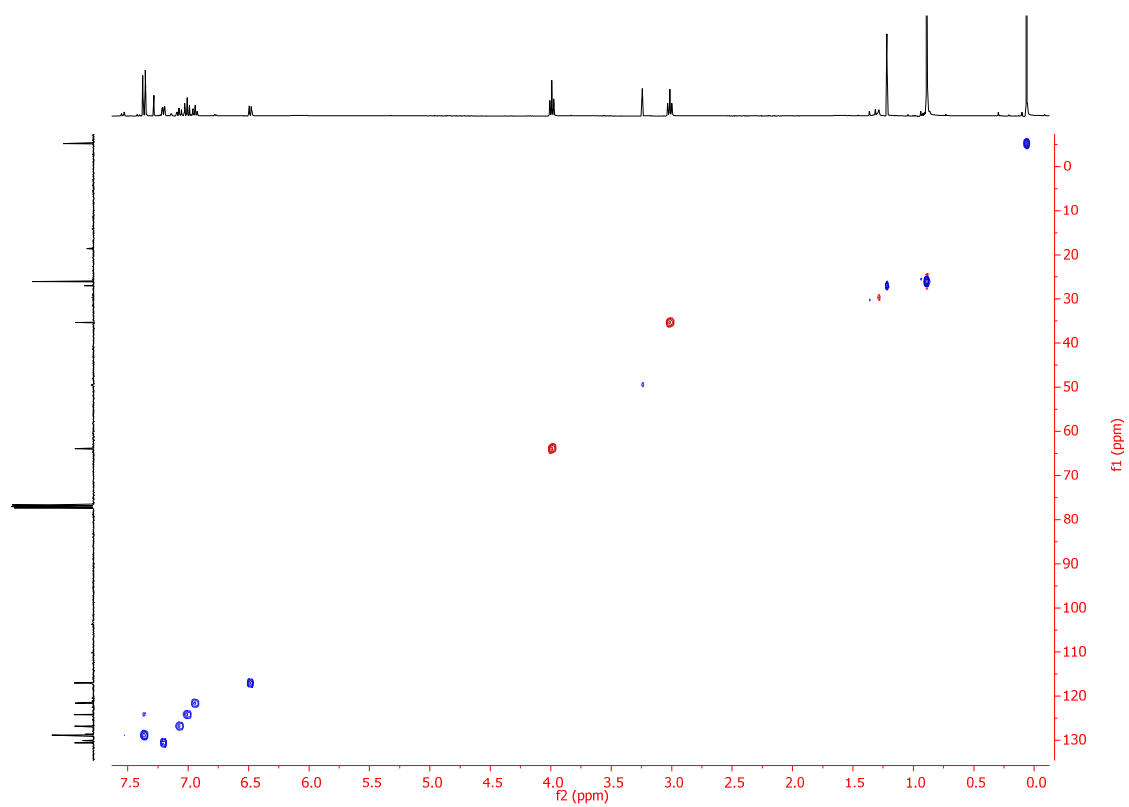

**Figure S1n.** HSQC of compound **7**

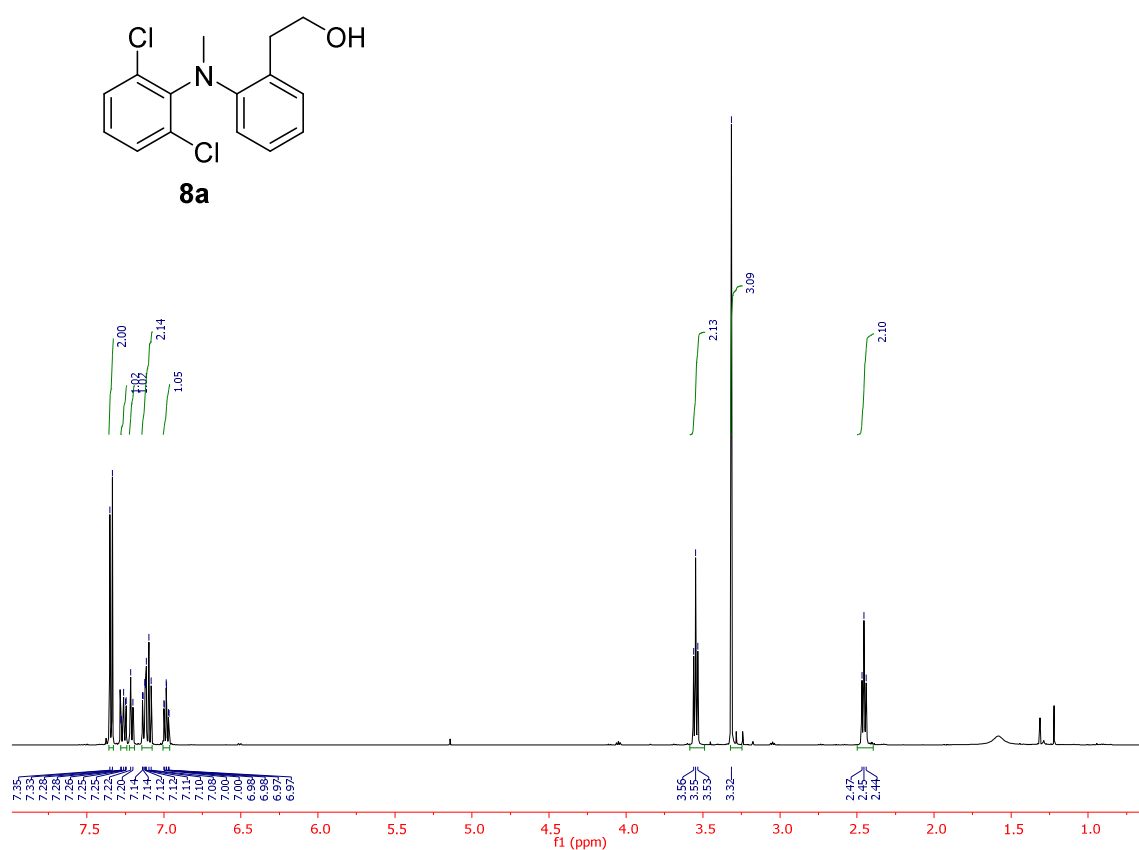

**Figure S1o.**  $^1\text{H}$  NMR spectrum of compound **8a**

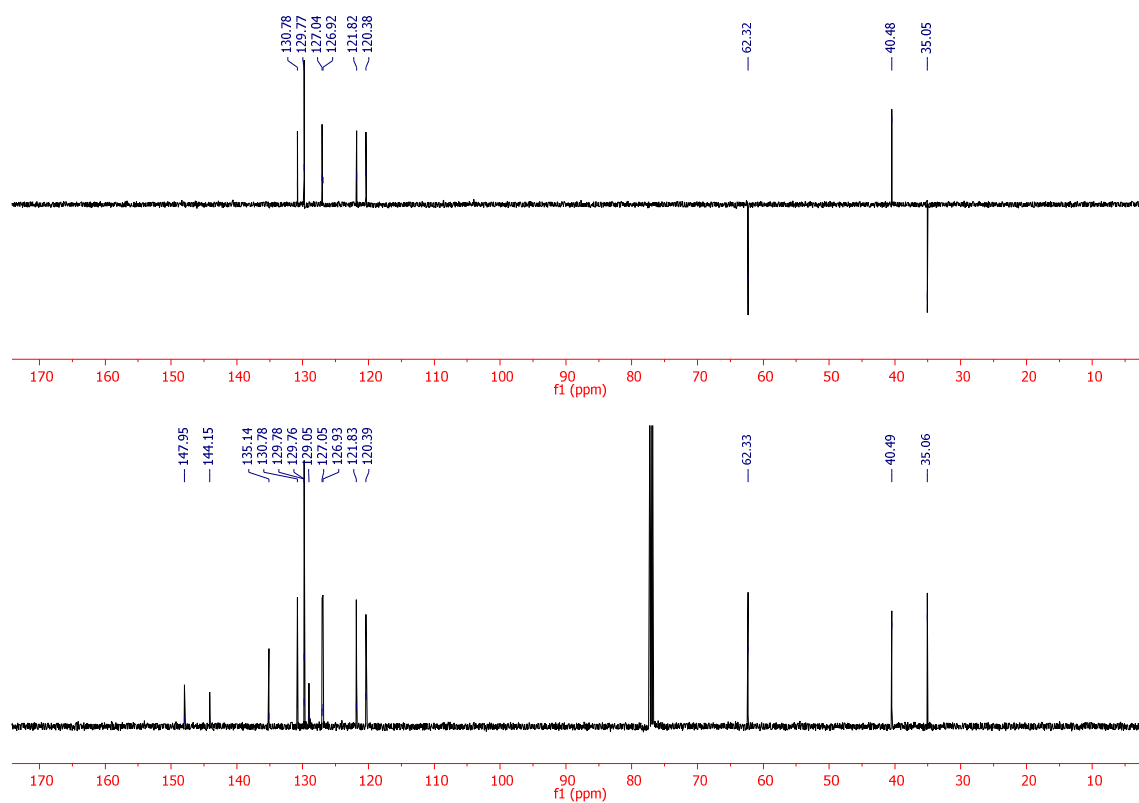

**Figure S1p.**  $^{13}\text{C}$  NMR spectrum of compound **8a**

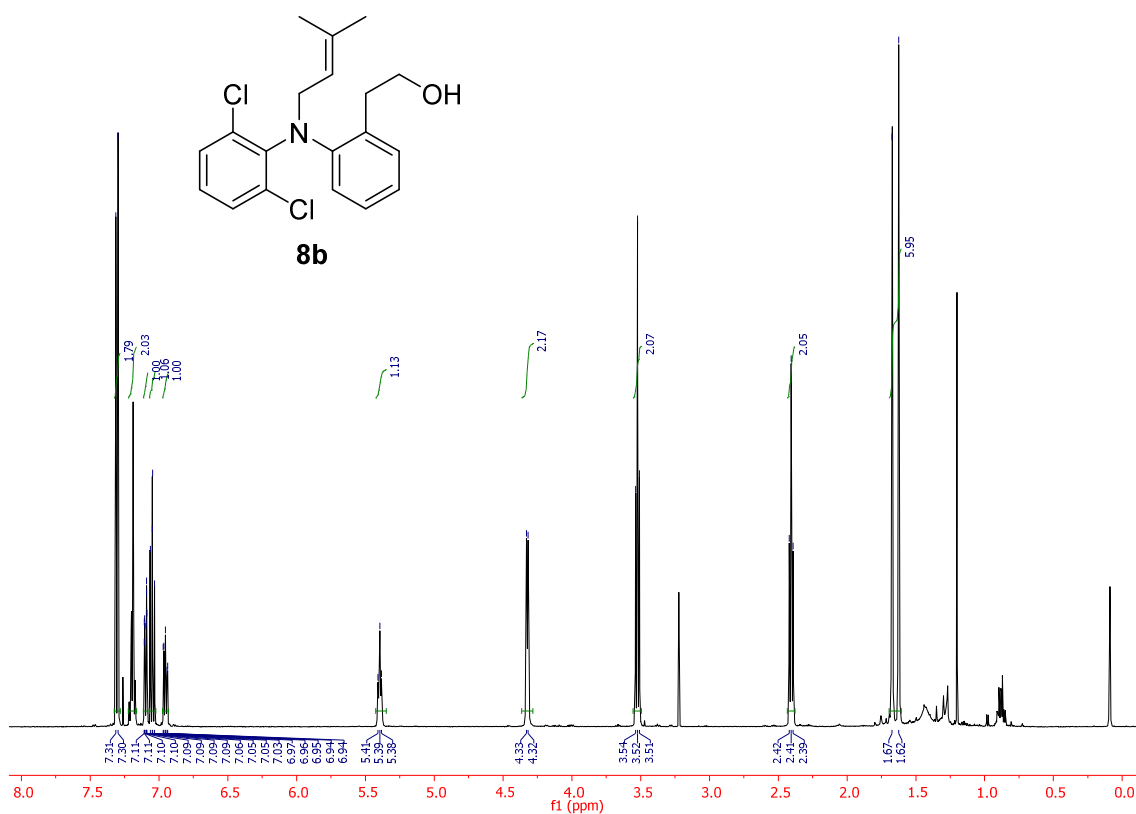

**Figure S1q.** <sup>1</sup>H NMR spectrum of compound **8b**

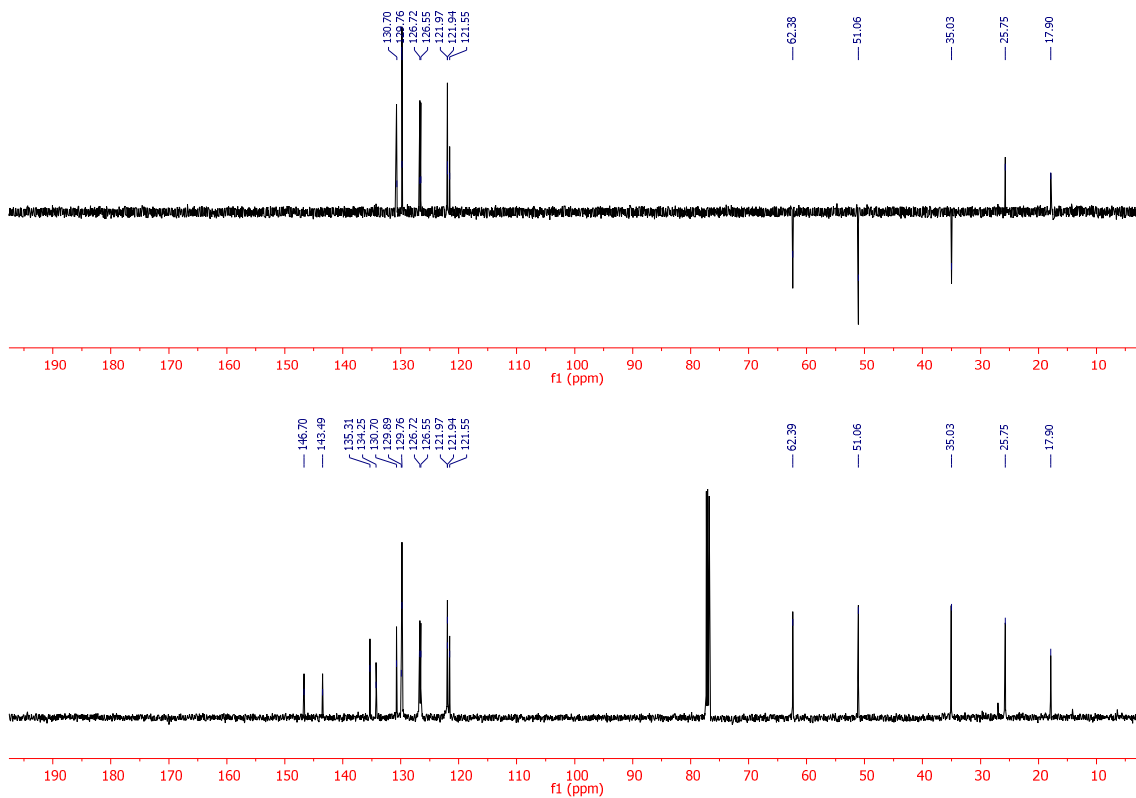

**Figure S1r.** <sup>13</sup>C NMR spectrum of compound **8b**

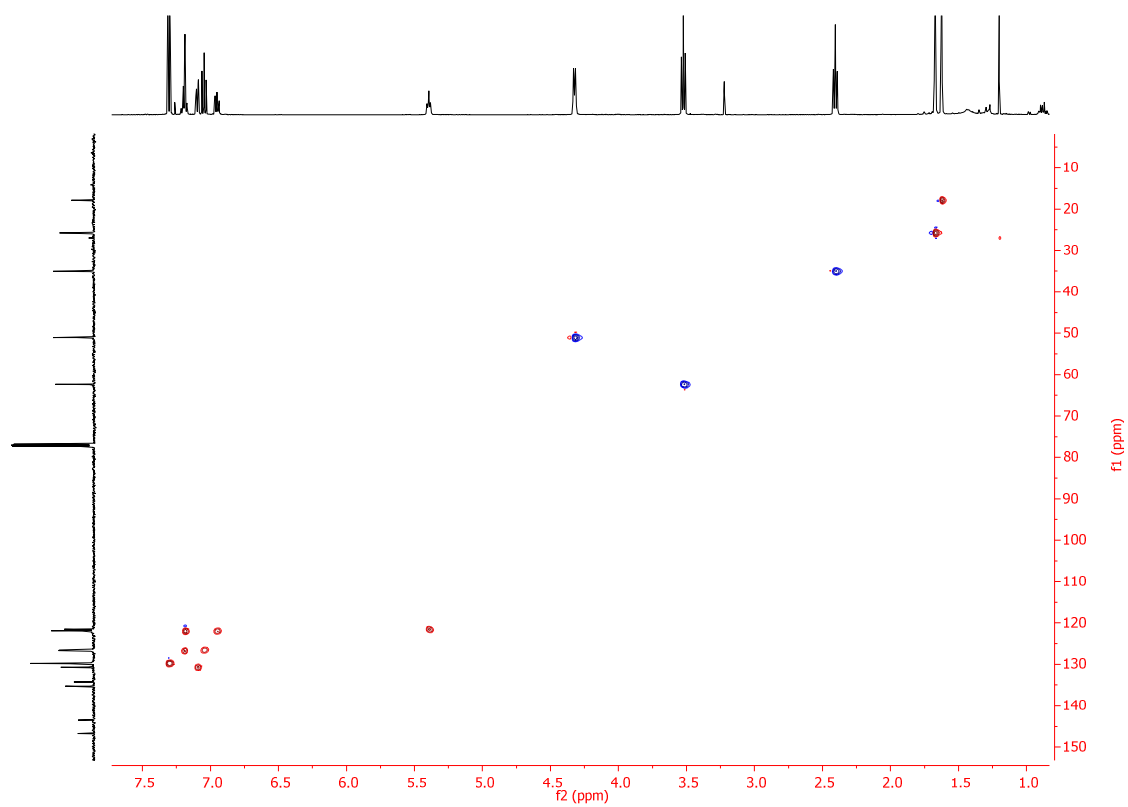

**Figure S1s.** HSQC of compound **8b**

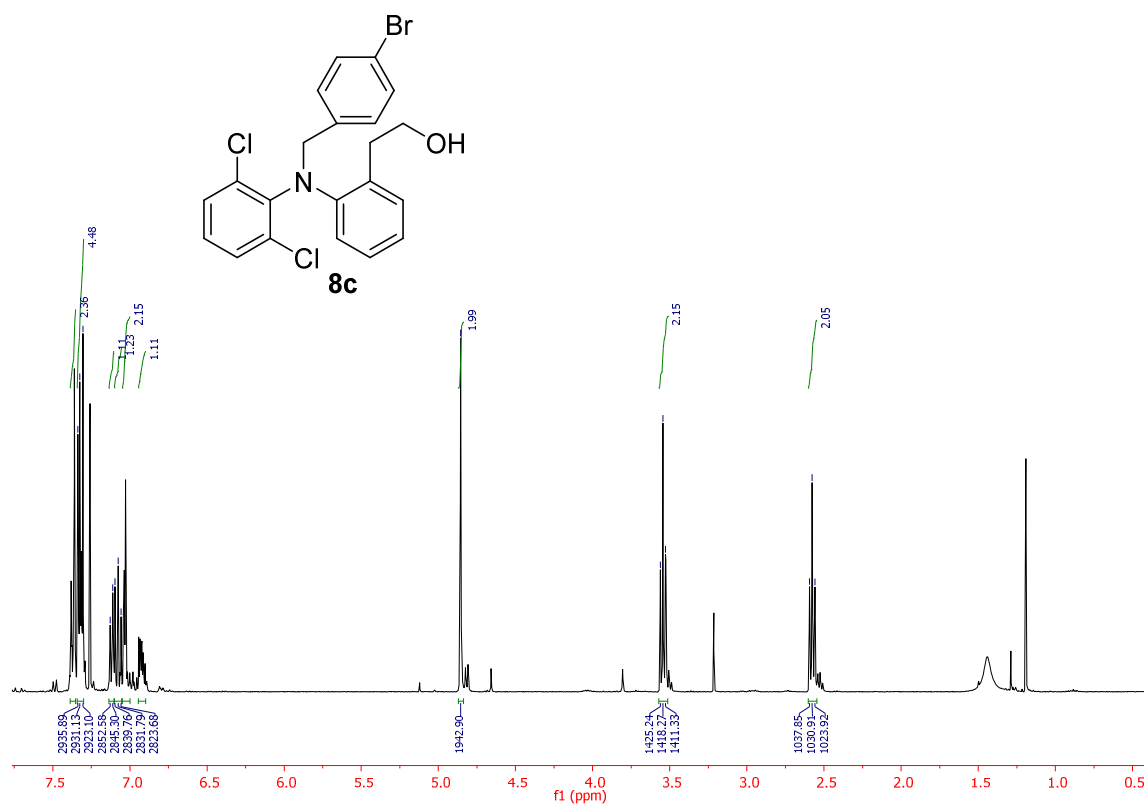

**Figure S1t.** <sup>1</sup>H NMR spectrum of compound **8c**

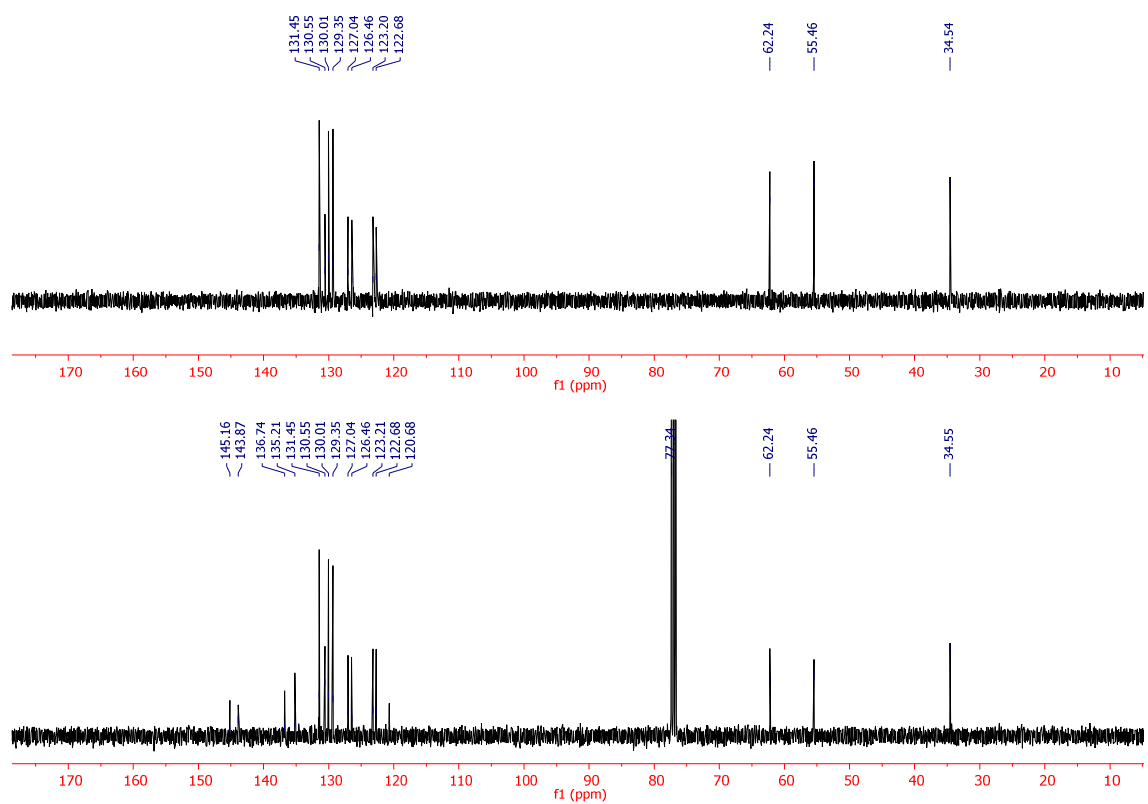

**Figure S1u.** <sup>13</sup>C NMR spectrum of compound **8c**

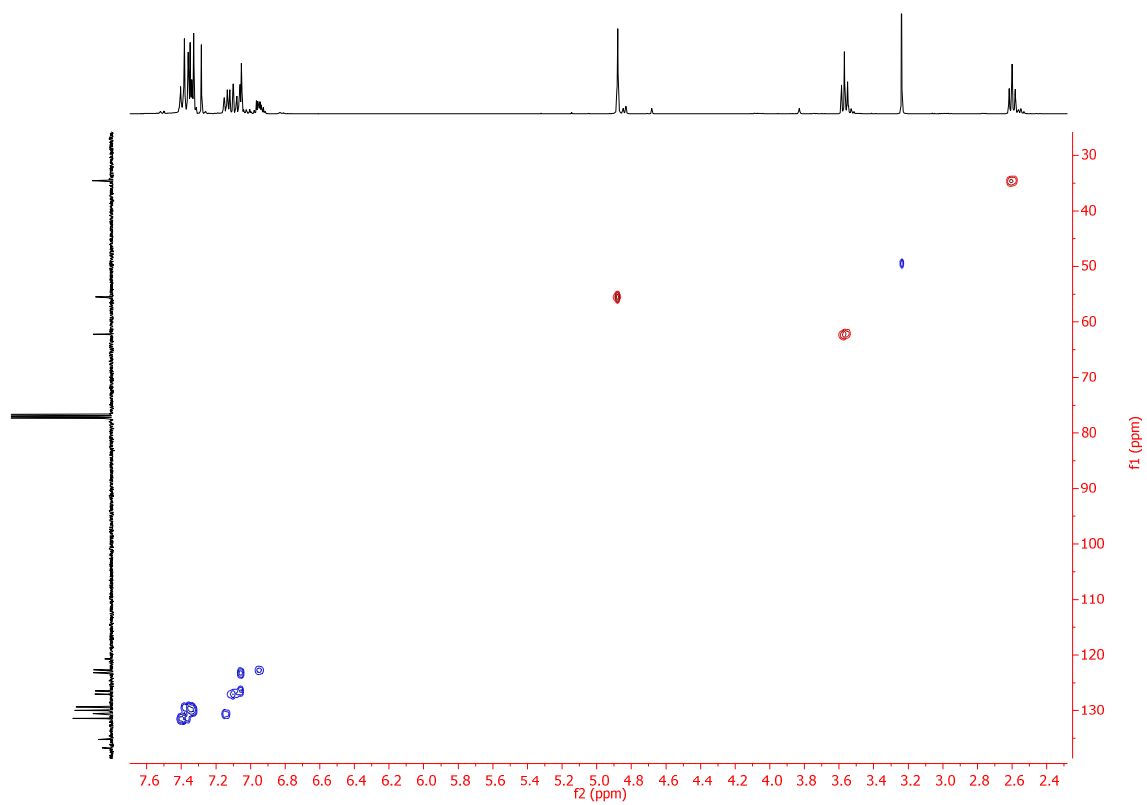

**Figure S1w.** HSQC of compound **8c**

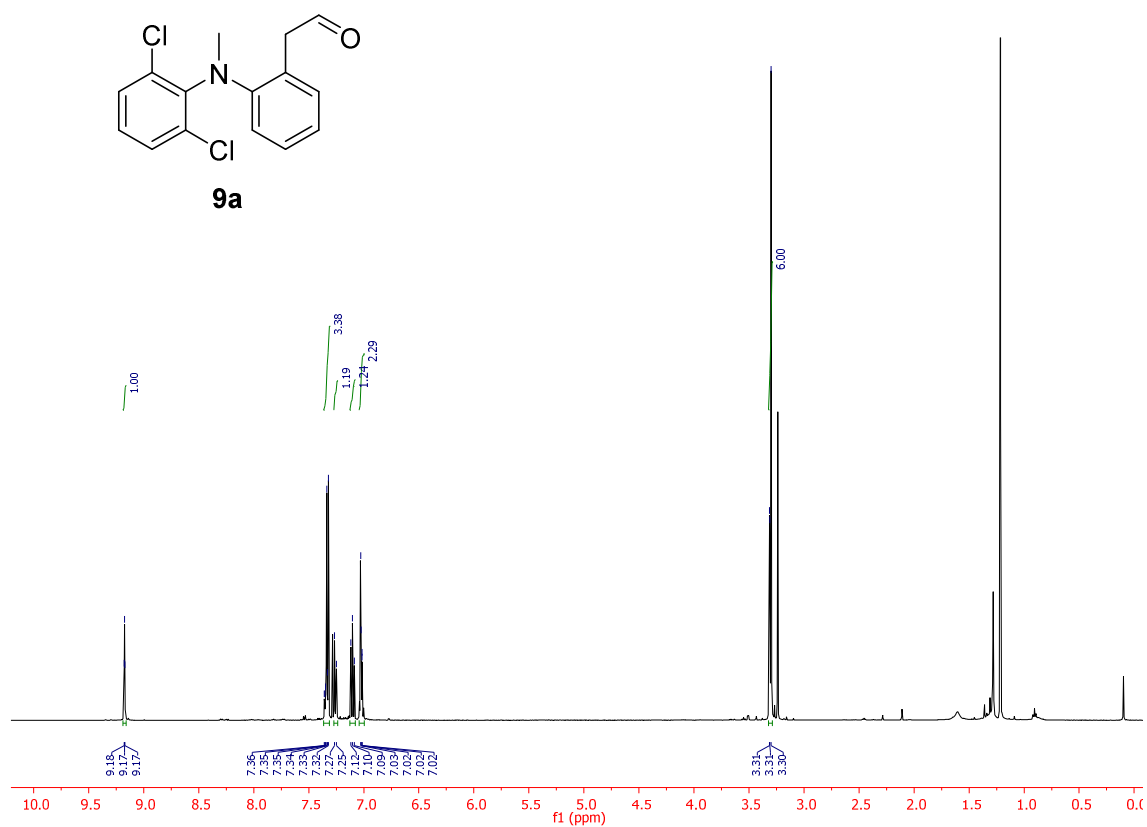

**Figure S1y.**  $^1\text{H}$  NMR spectrum of compound **9a**

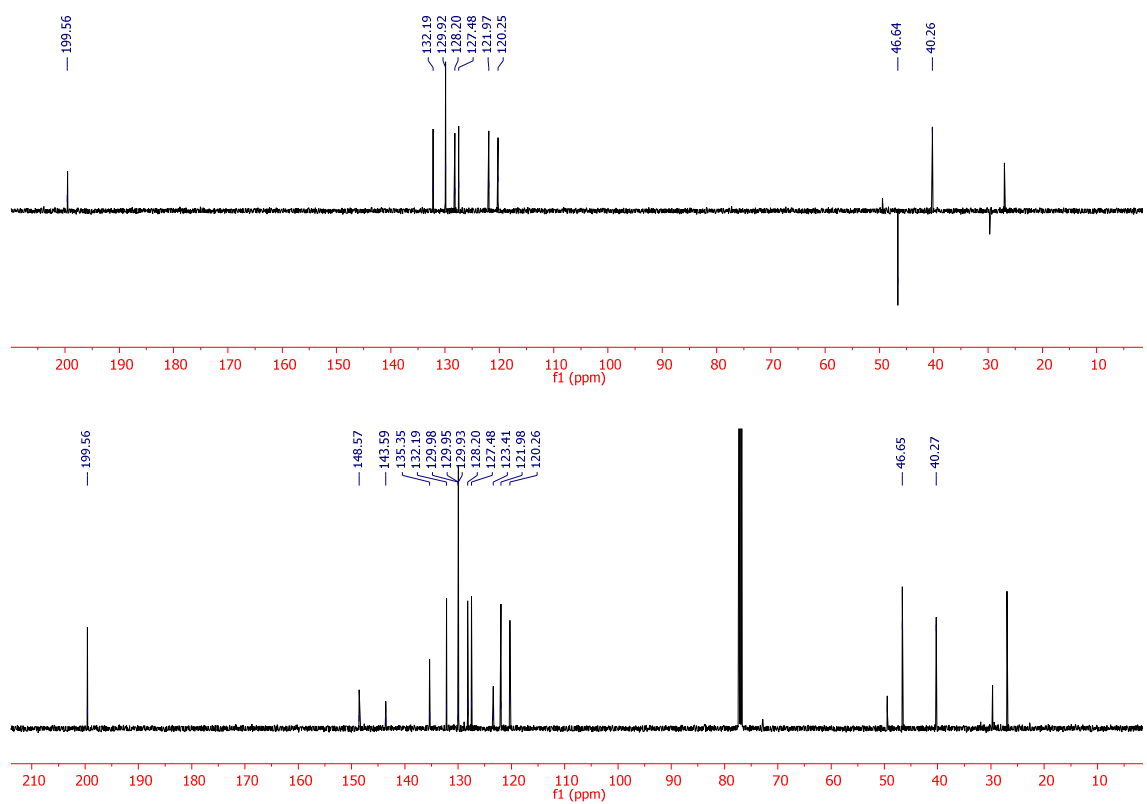

**Figure S1z.**  $^{13}\text{C}$  NMR spectrum of compound **9a**



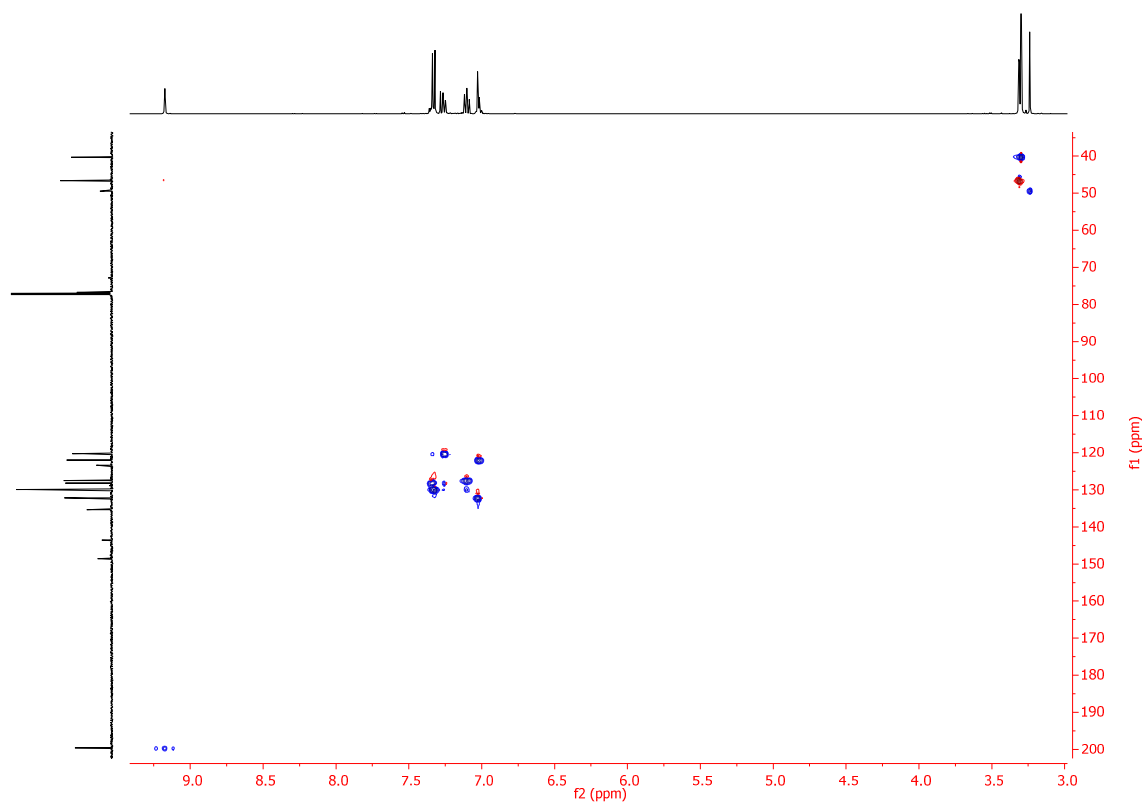

**Figure S1a2.** HSQC of compound **9a**

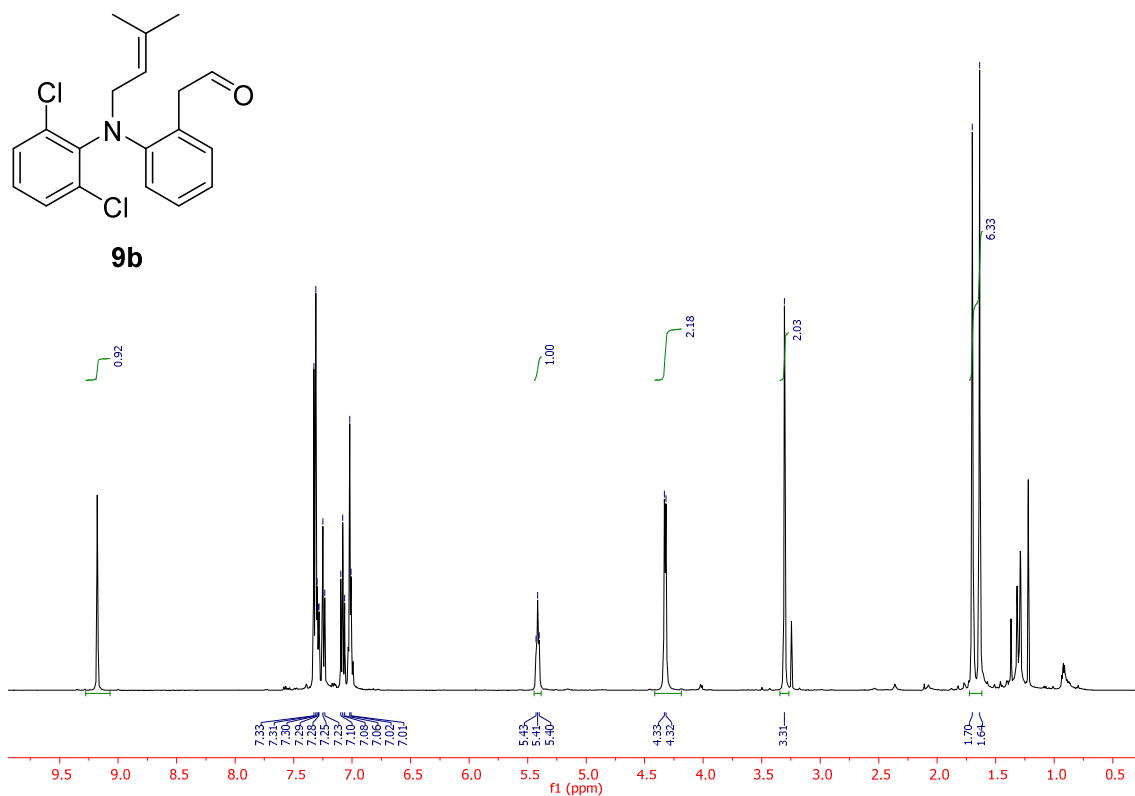

**Figure S1b2.** <sup>1</sup>H NMR spectrum of compound **9b**

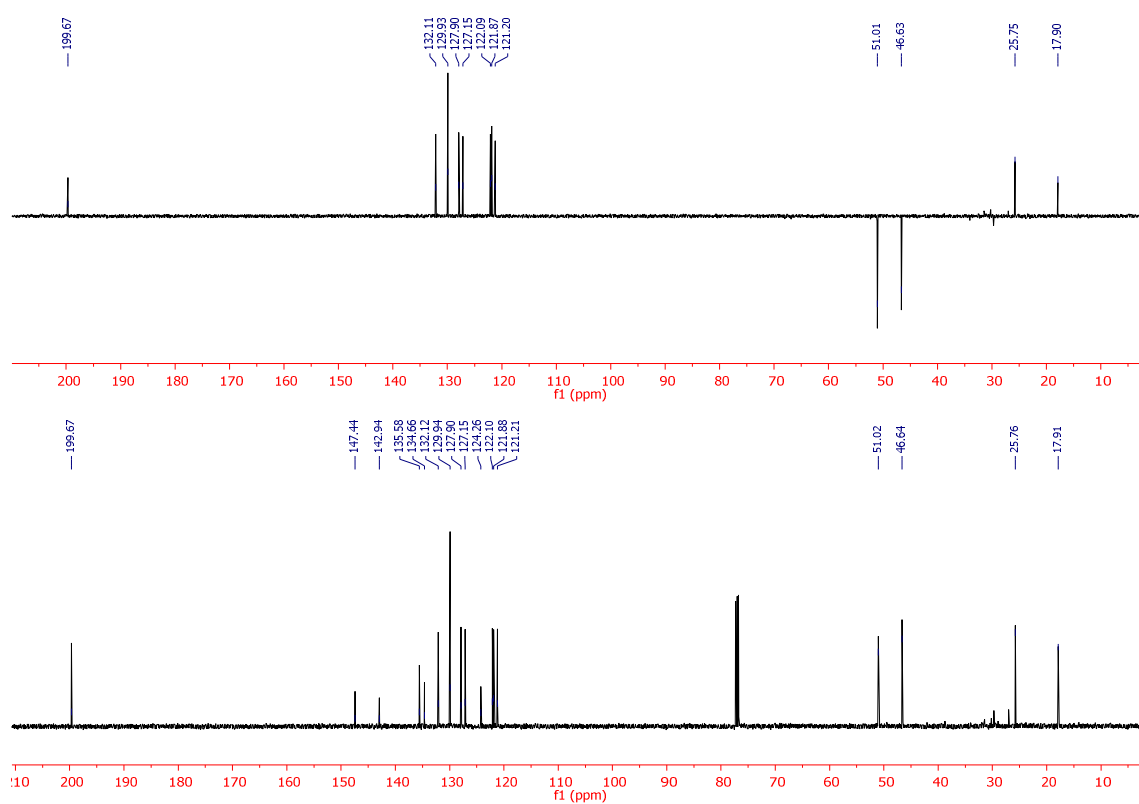

**Figure S1c2.** <sup>13</sup>C NMR spectrum of compound **9b**

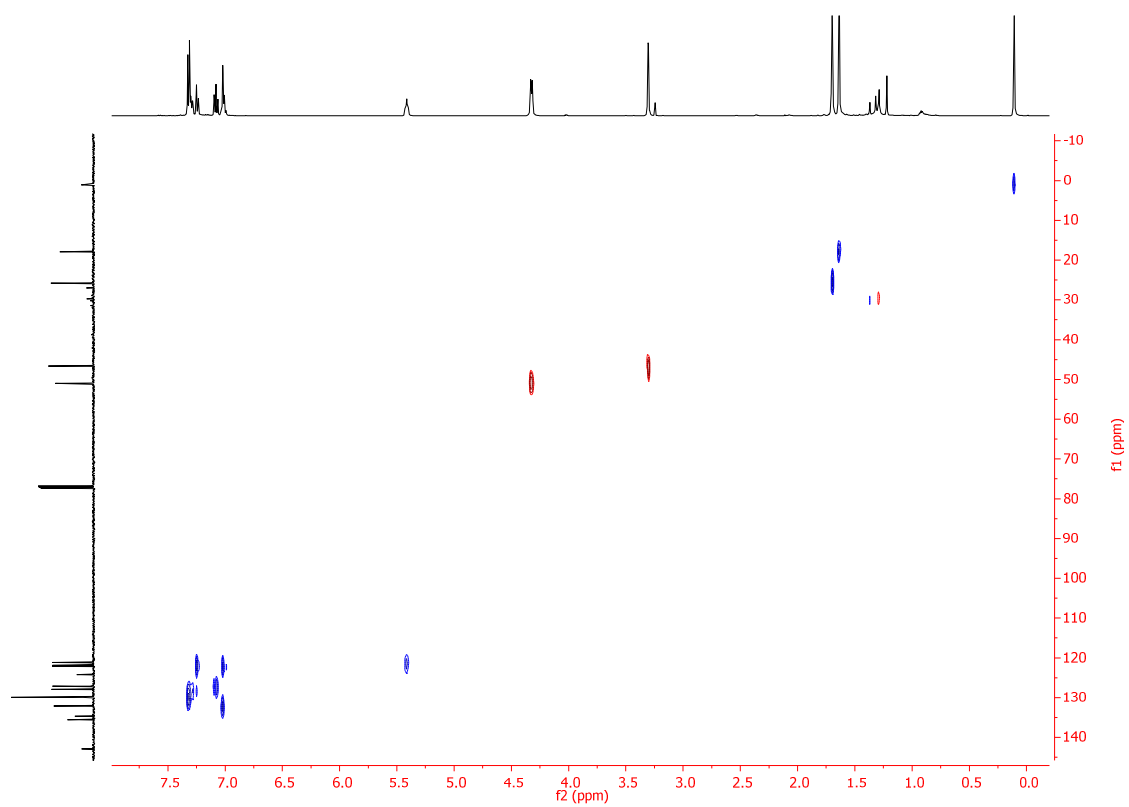

**Figure S1d2.** HSQC of compound **9b**



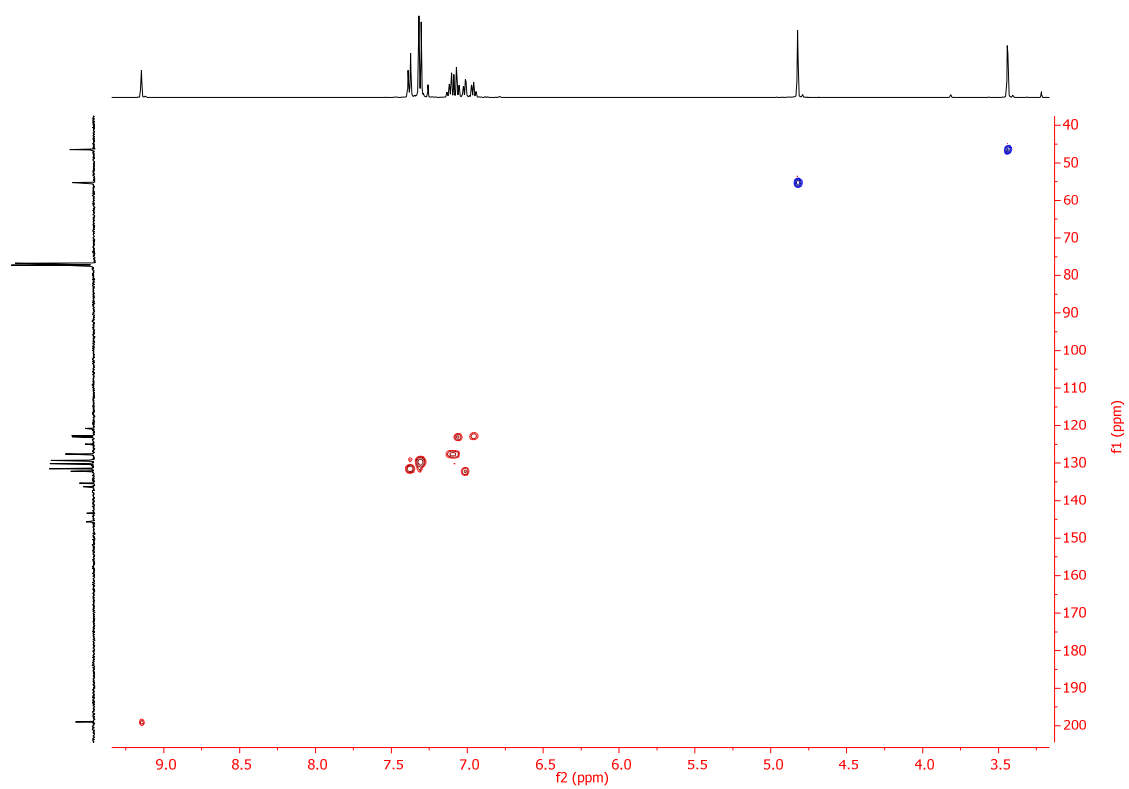

**Figure S1g2.** HSQC of compound **9c**

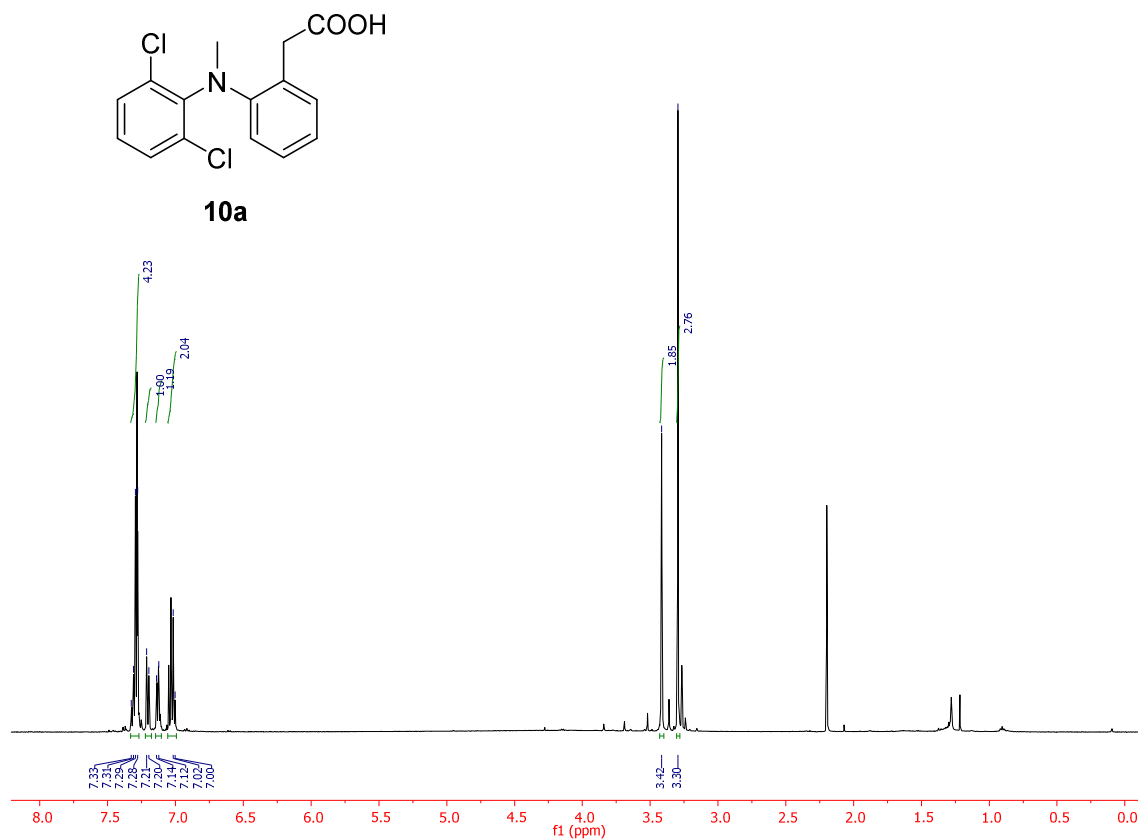

**Figure S1h2.**  $^1\text{H}$  NMR spectrum of compound **10a**

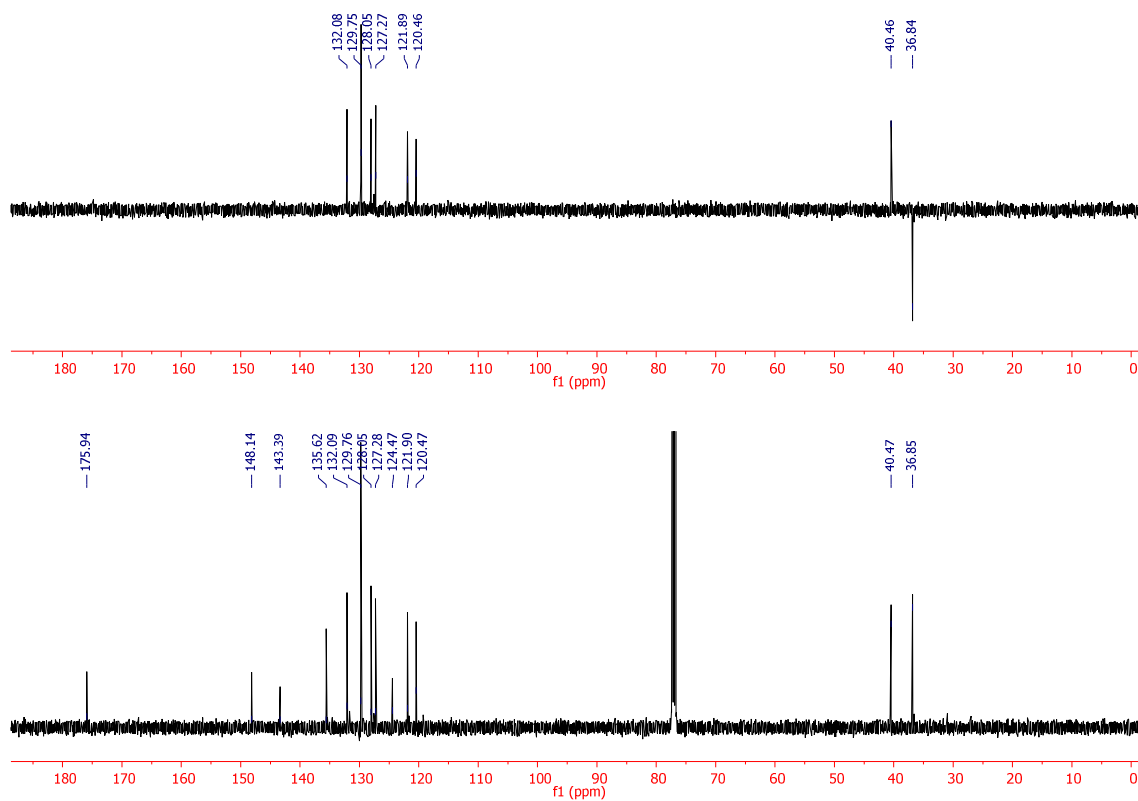

**Figure S1i2.**  $^{13}\text{C}$  NMR spectrum of compound **10a**

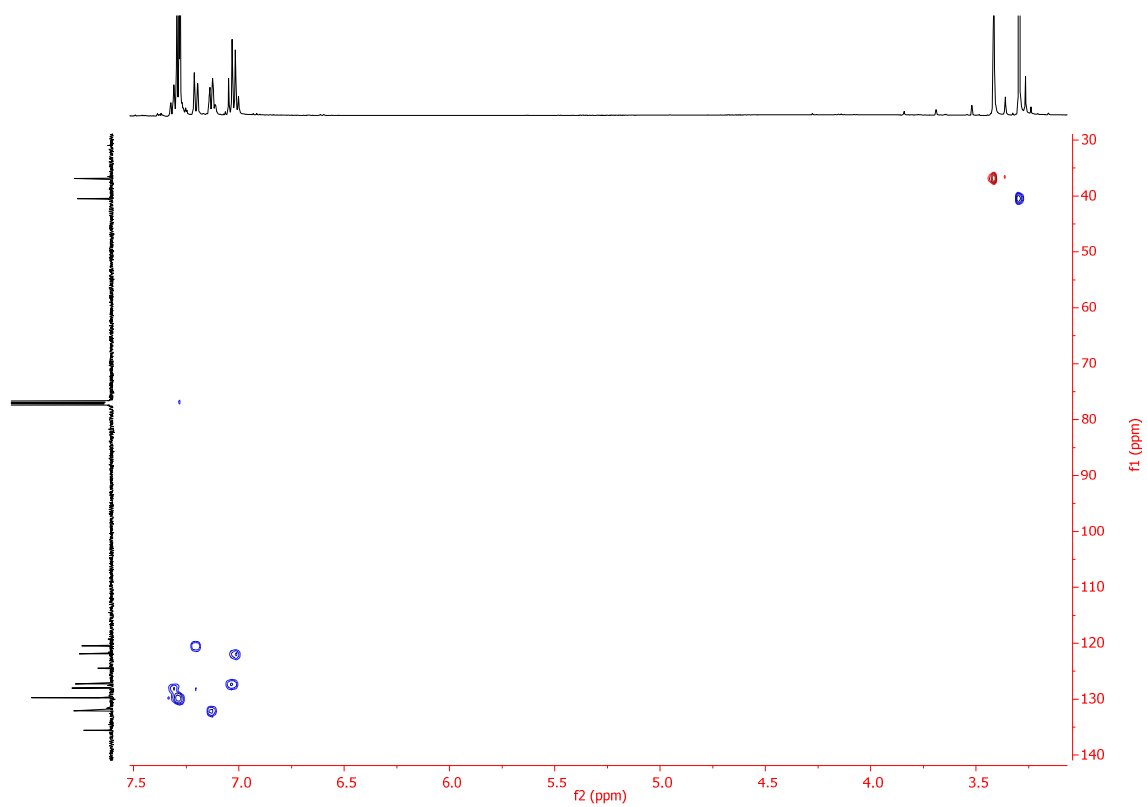

**Figure S1j2.** HSQC of compound **10a**

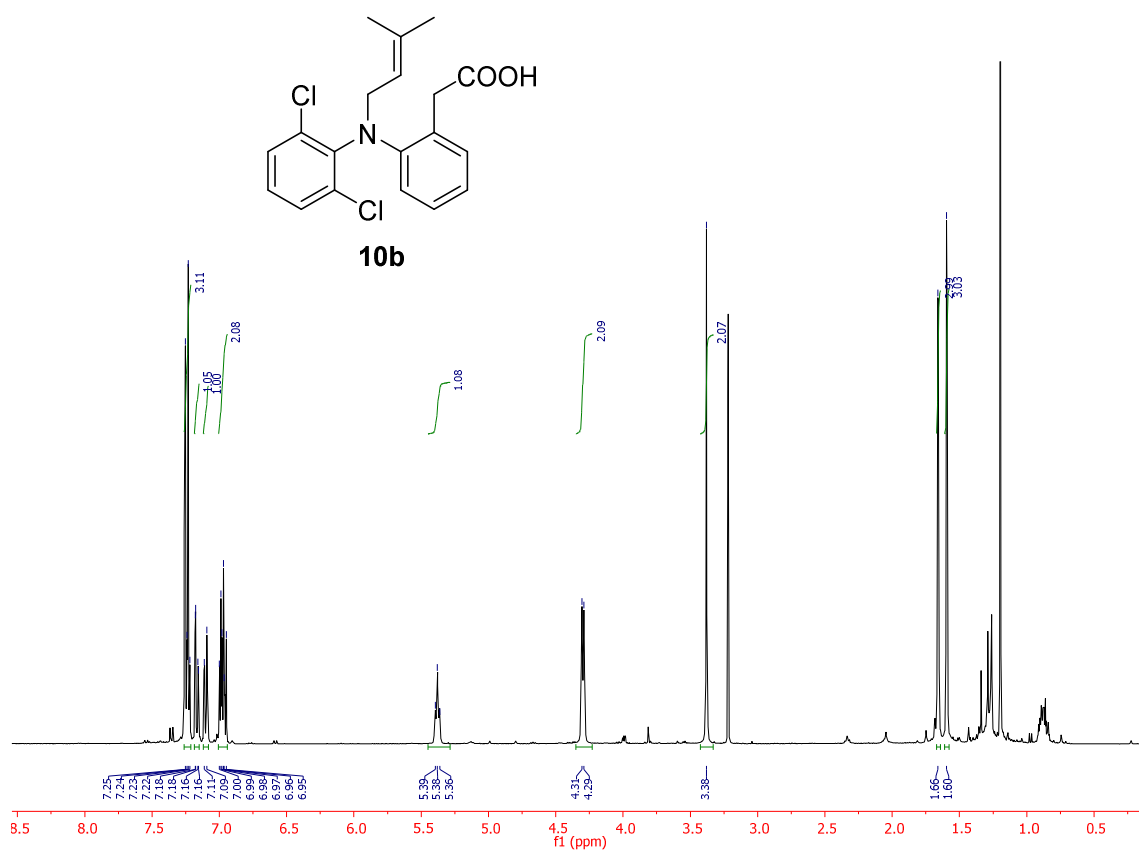

**Figure S1k2.**  $^1\text{H}$  NMR spectrum of compound **10b**

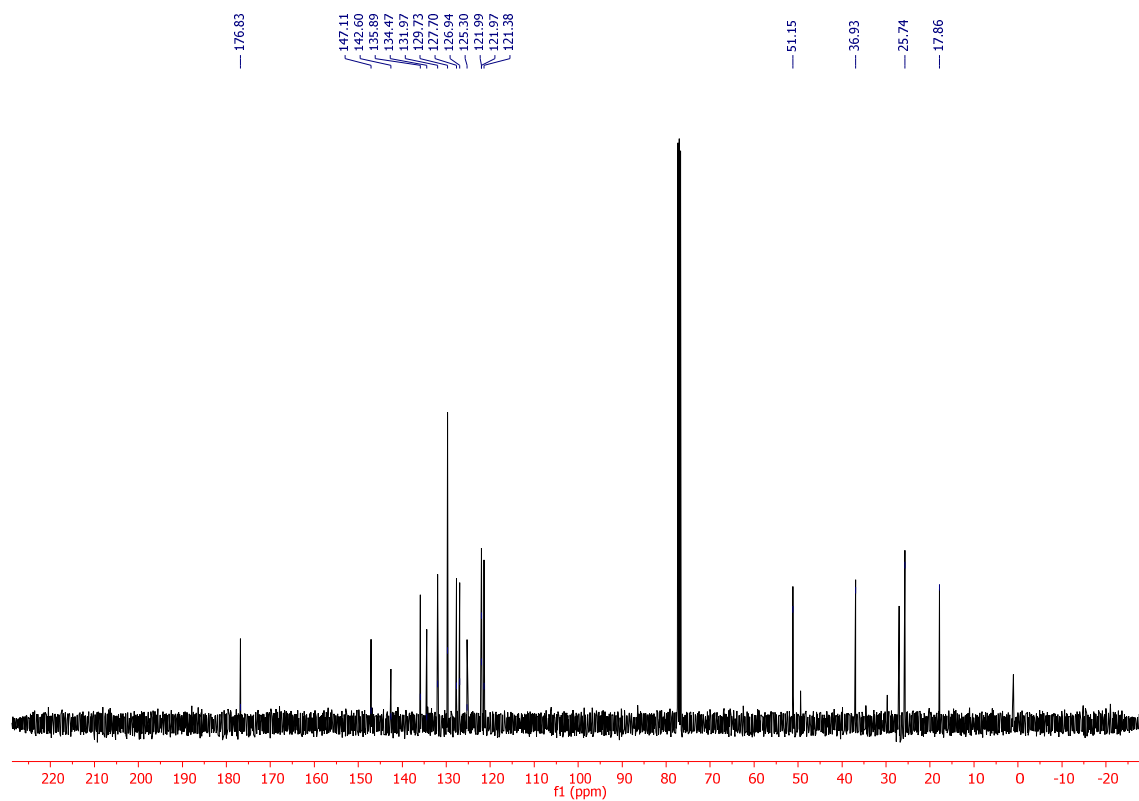

**Figure S1l2.**  $^{13}\text{C}$  NMR spectrum of compound **10b**



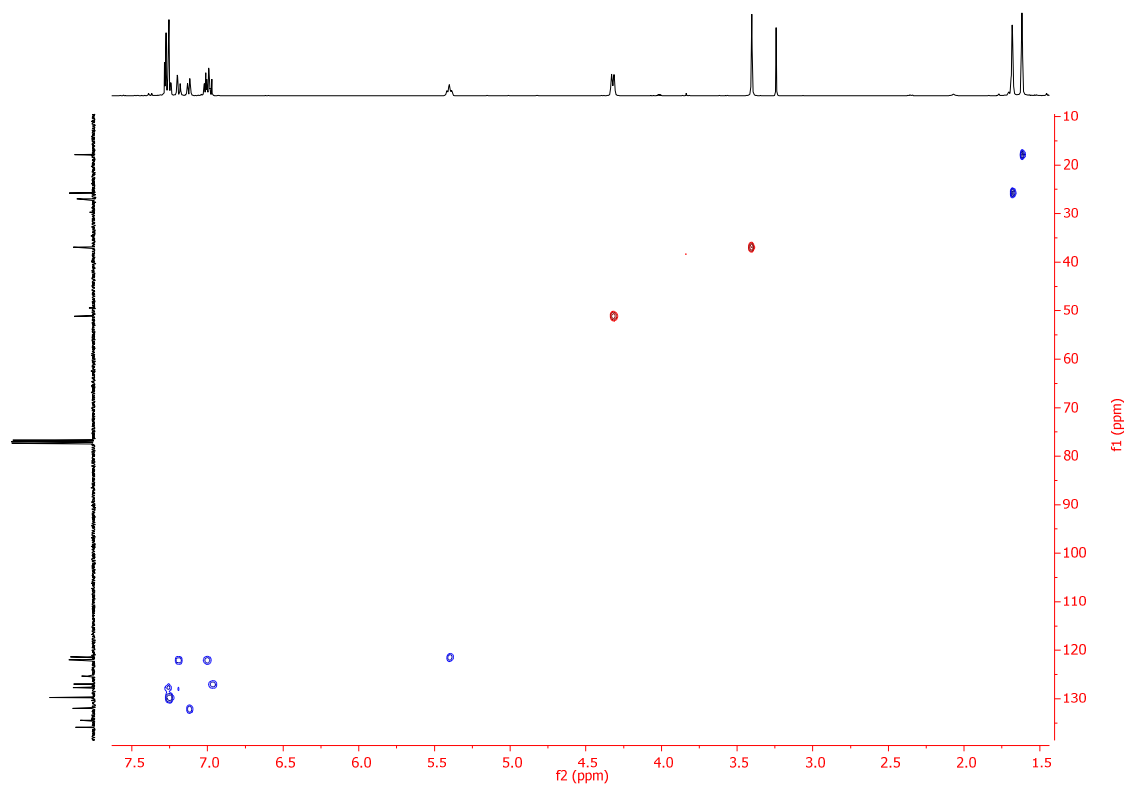

**Figure S1j2.** HSQC of compound **10b**

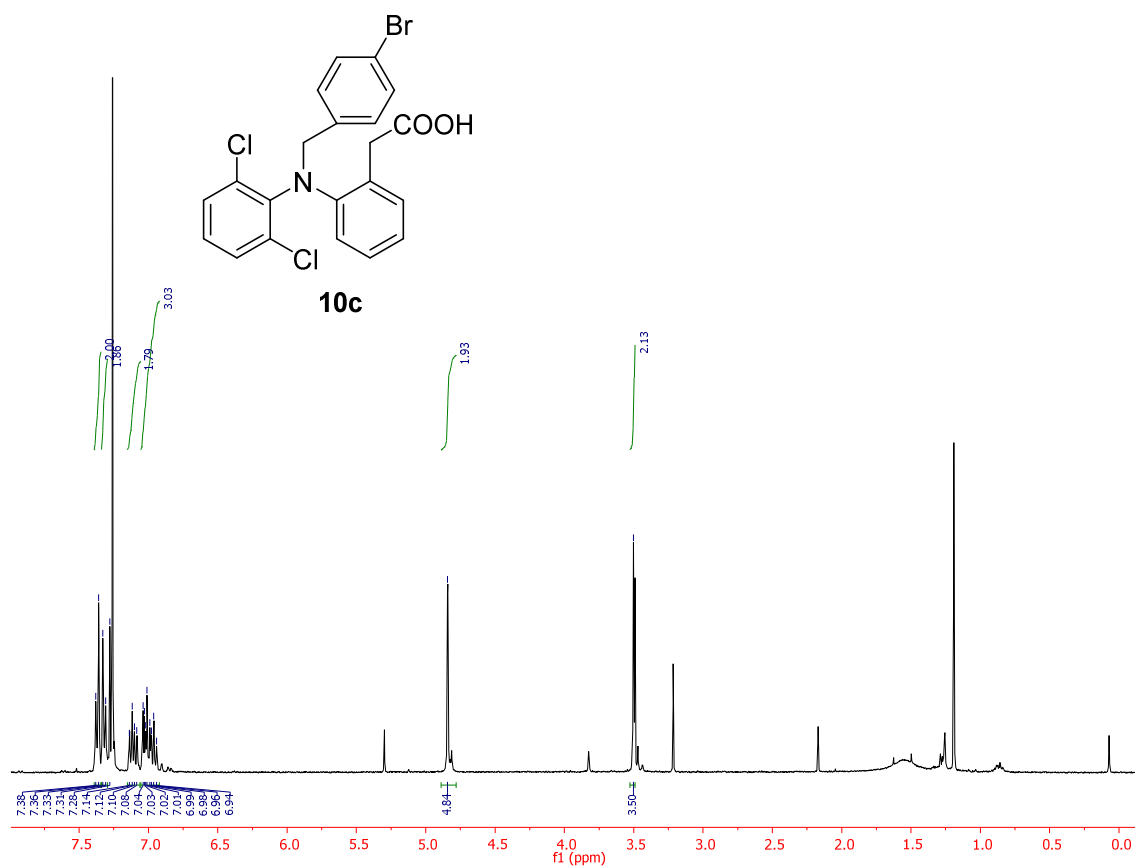

**Figure S1l2.**  $^1\text{H}$  NMR spectrum of compound **10c**

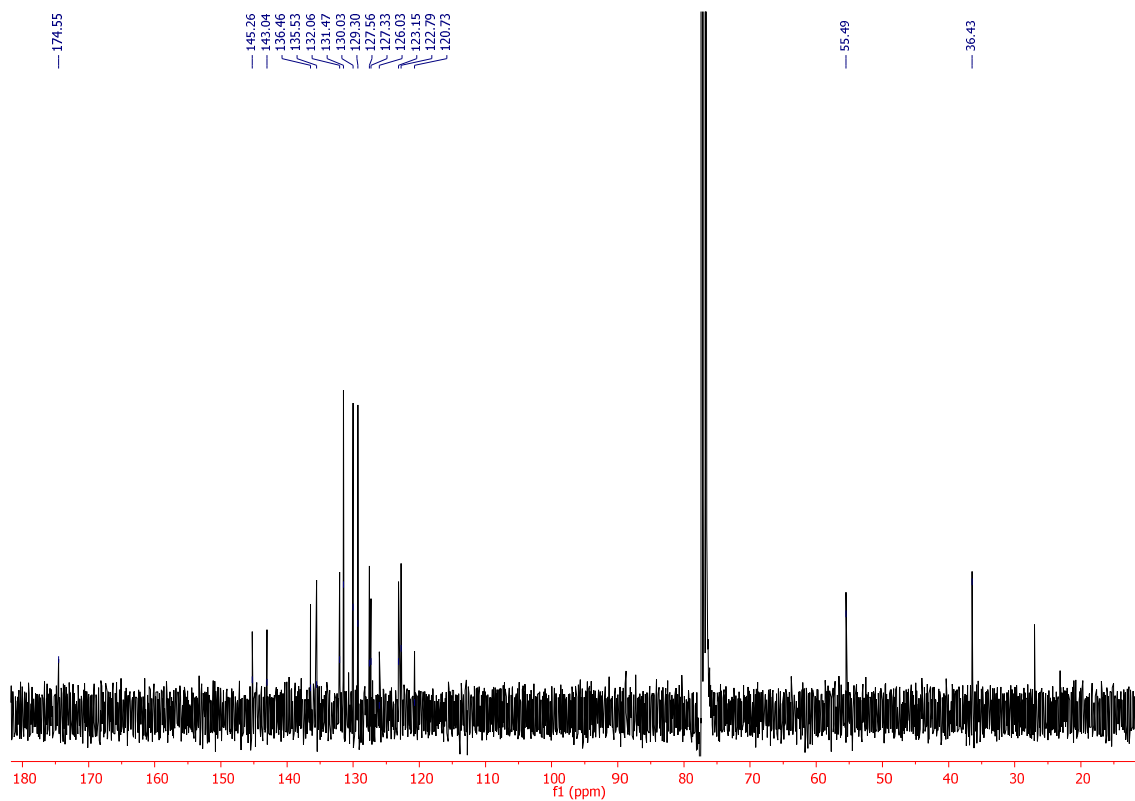

**Figure S1m2.**  $^{13}\text{C}$  NMR spectrum of compound **10c**

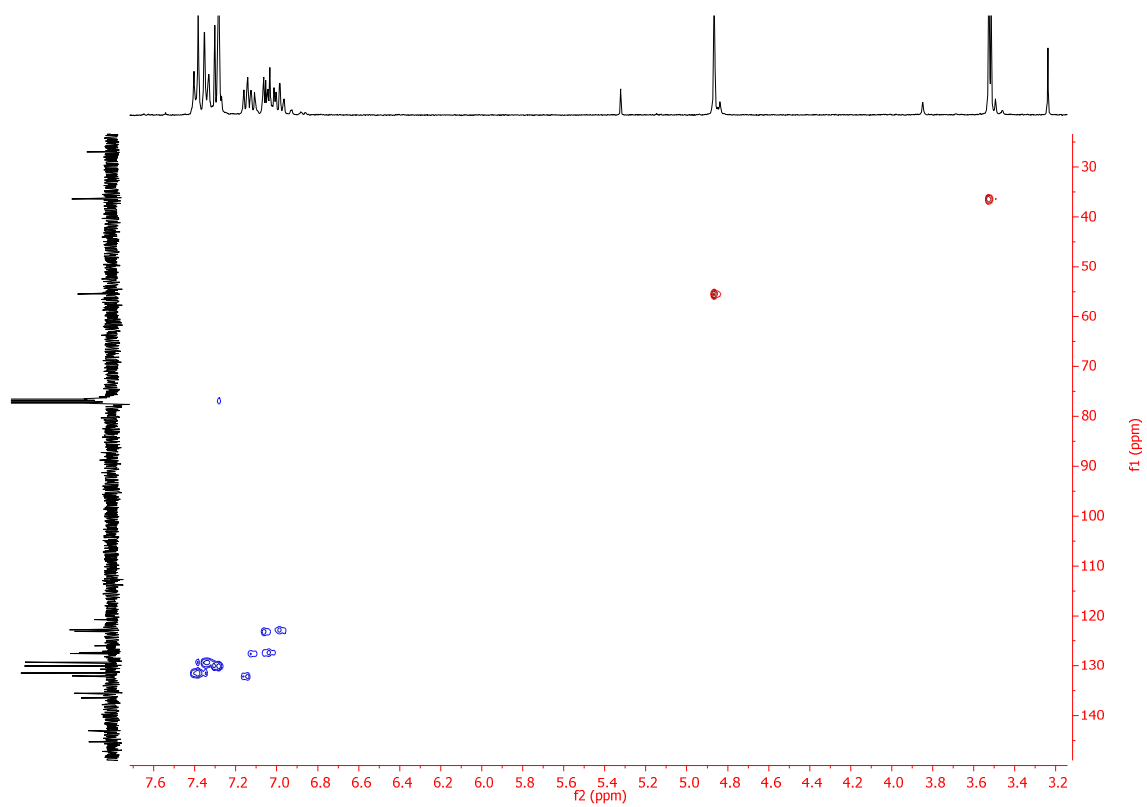

**Figure S1n2.** HSQC of compound **10c**
